1 Micro-community associated with ectomycorrhizal *Russula* symbiosis and  
2 sporocarp-producing *Russula* in Fagaceae dominant nature areas in southern China  
3 Wen Ying Yu <sup>a</sup>, Ming Hui Peng<sup>b</sup>, Jia Jia Wang<sup>a</sup>, Wen Yu Ye<sup>a</sup>, Zong Hua Wang<sup>b</sup>, Guo  
4 Dong Lu <sup>b\*</sup>, Jian Dong Bao<sup>a\*</sup>

5 <sup>a</sup> Fujian Universities Key Laboratory of Plant- Microbe Interaction, College of Life  
6 Science, Fujian Agriculture and Forestry University, Fuzhou, China

7 <sup>b</sup> State Key Laboratory of Ecological Pest Control for Fujian and Taiwan Crops,  
8 College of Plant Protection, Fujian Agriculture and Forestry University, Fuzhou,  
9 China

10

11 Address correspondence to Guo Dong Lu, [gdlufafu@163.com](mailto:gdlufafu@163.com), Jian Dong Bao,  
12 [baojd@fafu.edu.cn](mailto:baojd@fafu.edu.cn)

13

14

15 **ABSTRACT** *Russula griseocarnosa*, an ectomycorrhizal (ECM) fungus, is a  
16 species of precious wild edible mushrooms with very high market value in southern  
17 China. Its yield is affected by many factors including the tree species and  
18 environmental conditions such as soil microbiome, humidity. How the microbiome  
19 promotes the ECM fungus symbiosis with Fagaceae plants and  
20 sporocarp-producing has never been studied. In this study, we collected rhizosphere  
21 samples from Fujian province, the microbiota in the root and mycorrhizal  
22 rhizosphere were identified by Illumina MiSeq high-throughput sequencing. First,  
23 we compared three types of fungal communities: root tips infected with ECM  
24 *Russula* (type 1), tips with *Russula* sporocarp (type 2) and tips without ECM (type  
25 3). Our results showed that the fungal richness was negatively correlated with  
26 *Russula*. *Russula*, *Tomentella* and *Lactarius* were common in Fagaceae ECM roots.  
27 As to the mycorrhizal interactions, *Boletus* may be considered as an indicator  
28 species for sporocarp-producing *Russula*, and *Acremonium*, *Cladophialophora* were  
29 associated with *Russula* symbiosis. Second, we analyzed the fungal and bacterial

30 communities in rhizosphere soils from the corresponding to previously three types  
31 (type 1, 2, 3). *Dacryobolus* and *Acidocella* may be considered as an indicator  
32 species for sporocarp-producing *Russula*. Fungi *Tomentella*, *Saitozyma*,  
33 *Elaphomyces* and bacteria *Acidicaldus*, *Bryobacter*, *Sorangium* and *Acidobacterium*  
34 occurred more frequently in the ECM *Russula* rhizosphere. Furthermore, the  
35 indicators *Elaphomyces*, *Tomentella*, *Sorangium* had a positive correlation with  
36 *Russula* symbiosis by network analyses. Overall, our results suggest a relationship  
37 between micro-community and ECM *Russula* formation and *Russula* sporocarp,  
38 which may provide new strategies for improving *Russula* symbiosis rate and  
39 sporocarp production.

40 **KEYWORDS** micro-Community, *Russula*, ectomycorrhizae, Fagaceae

41 **IMPORTANCE** *Russula* (Russulaceae, Russulales, Agaricomycetes,  
42 Basidiomycota) species are ectomycorrhizal (ECM) fungi that form symbiotic  
43 associations with host roots. Approximately 750 *Russula* species have been reported  
44 in worldwide (1). *Russula* taxa showed high diversity, strong habitat preference and  
45 some preference for soil horizons (2)(Jo'zsef Geml 2010). Li M(3)(2010)identified  
46 that *Russula* emerge at least three divergent lineages based on the genetic diversity  
47 and geographic differentiation in southern China , and *R. griseocarnosa* belongs to  
48 one of the lineages. *R. griseocarnosa* is described from southern China, including  
49 Guangdong, Yunnan, and Fujian Provinces (4). *R. griseocarnosa* sporocarp,  
50 which is popularly commercially as food and medicine, is uncultivable and  
51 collected from the natural habitat. To date, there is little knowledge about the  
52 controlled production of *Russula* and its micro-community.

53 Several biotic factors affect ectomycorrhizal fungal communities: plant host species  
54 (5, 6) , plantation age (7), asymptomatic ectomycorrhiza endophytes (8),  
55 ectomycorrhizal propagules in the soil(9) and the traits of the dispersal propagules  
56 of ECM fungi (10). The common ectomycorrhizal *Russula* sp. was associated with  
57 seven host genera: *Pleioblastus chino*, *Quercus serrata*, *Symplocos prunifolia*, *Ilex*  
58 *pedunculosa*, *Prunus jamasakura*, *Gamblea innovans*, and *Lyonia ovalifolia*(11, 12).  
59 *R. griseocarnosa* grows in forests with Fagaceae in southern China (13). ECM

60 fungal communities strongly vary during long-term ecosystem development, even  
61 within the same hosts (14). Some *Russula* spp. was reported to be dominant  
62 colonizers of mature roots of pines (15)(Horton & Bruns, 2001) but did not  
63 colonize bioassay seedlings (16). ‘Early stage’ and ‘late stage’ mycorrhizal fungi of  
64 birch appeared distinction (7). Gebhardt also found that Ectomycorrhiza  
65 communities of *Quercus rubra* of different age performed specificity with low  
66 similarity between the chronosequence stands site (17) . Some fungal root  
67 endophytes prefer ECM formed by particular species of ectomycorrhizal fungi (8,  
68 18), potentially representing a second level of root endophyte selection. Dark  
69 septate endophytes are considered to be ubiquitous, colonizing mycorrhizal(19).  
70 ECM propagule communities in soil may diverge from those root-colonizing ECM  
71 communities and affect persistence of symbiotic relationship between mycorrhiza  
72 and available host roots by competitive networks(20). ECM propagules in soil are  
73 less frequent and diverse in early primary succession and become more frequent  
74 and diverse along forest development, due mainly to the accumulation of dormant  
75 spores of *Rhizopogon* spp. and sclerotia of *Cenococcum* spp(20). Simultaneously  
76 dispersal ability across ECM species correlated well with the composition of  
77 communities associated with host (21). *Russula* naturally propagate by  
78 short-distance spore dispersal rather than vegetative growth of dikaryophytic  
79 mycelia or long-distance spore dispersal(22). In all, the *Russula* ECM community  
80 may be affected by symbiotic structures and root endophytes in the roots,  
81 mycorrhizal extraradical mycelia, spores in the soil , as well as its dispersal ability.

82

83 Mycorrhizal interactions are usually classified on the basis of the features of the  
84 symbiotic interfaces(23). The ECM community colonizing root tips was strongly  
85 structured by competitive interactions or ecological processes generating a similar  
86 spatial pattern, rather than neutral processes. The ECM *Cortinari* sp. and  
87 *Lactarius rufus* competed for root tips(24). Both *Cenococcum geophilum* and  
88 *Clavulina cinerea* as mycorrhizas and as extramatrical mycelium (EMM) in a *Pinus*  
89 *resinosa* plantation showed a negative correlation(25). Hortal suggests that

90 interspecific competition between *Lactarius deliciosus* (inoculated fungi) and  
91 *Rhizopogon roseolus* (indigenous fungi) occurs in the root system for  
92 ectomycorrhiza formation in available roots, rather than in the extramatrical  
93 mycelium phase (26). However, associations among *Suillus bovinus* and  
94 *Gomphidius roseus* occur within ectomycorrhizal roots (27). There are also a  
95 number of notable examples of associations between sporocarps of different species,  
96 such as between *Boletus parasiticus* and *S. citrinum*, *Asterophora parasitica* and  
97 *Lactarius*, and between *Claudopus parasiticus* and *Cantharellus cibarius* (28),  
98 However, mycorrhizal interaction studies of *Russula* are limited in the literature.

99

100 Similar to the rhizosphere, mycorrhizosphere is the feet of fruiting bodies or the  
101 root of ectomycorrhizal fungi . Mycorrhizosphere may constitute a hot spot(29), in  
102 which microorganisms were affected(30-32).The mycosphere effect was prominent ,  
103 though previous studies have failed to demonstrate significant differences between  
104 bacterial communities associated with roots colonized by *Suillus variegatus* and *T.*  
105 *submollis*, *Lactarius* sp. and *Tomentella* sp.(33) or by *C. geophilum* and *Russula* sp.  
106 (34). It has also been established that mycorrhizal networks have different  
107 microbial communities compared with bulk soil by stimulating some families such  
108 as *Bradyrhizobiaceae*, *Burkholderiaceae*, and *Pseudomonadaceae* (35). Bacterial  
109 activity is stimulated by the provision of easily available nutrition such as  
110 carbonaceous compounds (30).The mycosphere effect might exert strong influences  
111 on the bacterial community of soil(36), in which bacterial activity is stimulated by  
112 trehalose, which is degraded by hyphosphere and derived from fungi (37, 38).  
113 Andersson(39)(2003)., who used phospholipid fatty acid profiles to characterize  
114 bacterial communities, has demonstrated that basidiomycete wood-decomposing  
115 fungi are able to influence bacterial community structure. Bacteria adapted to the  
116 mycospheres of three or more or just one fungal species was defined as specific  
117 selective bacterial(40). The specific members of the Sphingomonadaceae family  
118 selected were at the bases of the fruiting bodies of the ectomycorrhizal fungi  
119 *Laccaria proxima* and *Russula exalbicans* in comparison to the adjacent bulk soil,

120 major of which did not cluster with known bacteria from the database (36, 41). On  
121 the other hand, some mycorrhiza-associated bacteria have been shown to produce  
122 compounds that are antagonistic to plant pathogens (42). Meanwhile, “mycorrhiza  
123 helper bacteria” (MHB) appeared to positively influence the development and  
124 function of ectomycorrhiza (43), but the effects varied with different species  
125 combinations (44, 45). *Ralstonia* sp. and *Bacillus subtilis* can promote *Suillus*  
126 *granulatus*-infected *Pinus thunbergii* (34). *Bacillus subtilis* helped the growth of  
127 *Cenococcum geophilum* Fr and promoted *Suillus granulatus* infection (34) but  
128 inhibited *Rhizopogon* sp. infection (45). Apart from bacterial , ectomycorrhizal  
129 symbionts strong also selected ascomycete communities and other ECMs(31)  
130 (32).Högberg (2002)(46) demonstrated that the EMM is at least 30% of the  
131 microbial biomass in boreal forest soils. ECM fungi competed with saprotrophic  
132 fungi in soil by the EMM(47). *Tuber rufum* and some members of *Boletales* are  
133 typically restricted to productive truffle plots. On the other hand, *Hebeloma*,  
134 *Laccaria* and *Russula* species are mostly associated with unproductive truffle plots,  
135 Ectomycorrhizae belonging to *Thelephoraceae* are frequently found in mature  
136 truffle orchards but do not seem to affect sporocarp production (32). Ascomycetes  
137 associated with ectomycorrhizas: molecular diversity and ecology with particular  
138 reference to the Helotiales had been reported (48).However, the rhizosphere,  
139 mycosphere effect of *Russula griseocarnosa* has not been recorded in the literature.

140

141 Regarding the relationship between the amount of soil EMM with ectomycorrhizae  
142 and sporocarps, different mycorrhizas have different conclusions . Zampieri et  
143 al.(2010)(49) showed that the mycelium of *Tuber magnatum* was more widespread  
144 than was inferred from the distribution of its fruiting bodies and ectomycorrhizae.  
145 Zhou et al. (2001) (50)demonstrated that the development of *Suillus grevillei*  
146 sporocarps is correlated with amount of EMM and ectomycorrhizae of *S. grevillei*  
147 in a narrow area. The *Tuber melanosporum* EMM biomass detected in the soil from  
148 the natural truffle ground was significantly greater than that of other plant orchards  
149 analyzed, and the lowest amount of *T. melanosporum* mycelium maintained a

150 sporocarp production in plant orchards (51). However, Some ECMs are consistent  
151 in ectomycorrhizae but inconsistent in sporocarps. De la Varga et al. (52)(2012)  
152 quantified *B. edulis* extraradical mycelium in a Scots pine forest and found a  
153 positive correlation between the amount of mycelia and the presence of *Boletus*  
154 *edulis* mycorrhizae, but not with the productivity of fruiting bodies. However, the  
155 relationship between the amount of *Russula* with ectomycorrhizae and sporocarps is  
156 scarce in the literature.

157 The relation between the productivity of fruiting bodies and ECM symbiosis is still  
158 unclear. Some ectomycorrhizal species produce abundant ectomycorrhizal root tips  
159 but few or no fruiting bodies, while other ectomycorrhizal fungi form abundant  
160 fruiting bodies but a low number of ectomycorrhizal root tips. Guidot et al.  
161 (53)(2001) found a spatial congruence of above- and belowground distribution for  
162 *H. cylindrosporium* . However, De la Varga et al.(52) (2012) found that the presence  
163 of mycorrhizae of the *B. edulis* symbiotic rate was not consistent with the  
164 production of fruiting bodies. There are also *Russula* species difference between the  
165 above-ground *Russula* sporocarp and underground *Russula* mycorrhizal(2) .  
166 Geml(2010) (2)observed that 15 and 45 of the 50 *Russula* phylogroups species were  
167 found in sporocarp and soil clone sequences, respectively. Given the long delay  
168 between the establishment of the plantation and the formation of sporocarps, short-  
169 and medium-term control of the survival and persistence of fungal symbionts in  
170 plantations have to still be evaluated by the assessment of vegetative structures as  
171 the ectomycorrhizas or extraradical mycelium.

172 Microbial community affected mycorrhizal fungal function (for example, symbiosis  
173 establishment capacity, sporocarp production), and the reciprocal effects are vice  
174 versa. The microorganisms associated with mycorrhizal fungi may either have  
175 positive or negative impacts on fungal spore germination, growth, nutrient  
176 acquisition and plant colonization (43, 54). *Tuber indicum* altered the  
177 ectomycorrhizosphere and endoectomycosphere microbiome and metabolic profiles  
178 of the host tree *Quercus aliena* (55). *Tuber borchii* shapes the  
179 ectomycorrhizosphere microbial communities of *Corylus avellana*(56). Therefore,

180 we speculate that detecting the communities of *Russula* can tracked ECM  
181 persistence throughout the entire biological cycle, which will help to control  
182 ectomycorrhiza formation and sporocarp production. In this study, to understand the  
183 communities of the targeted *Russula griseocarnosa* and to find the possible  
184 indicator microbes of successful *Russula griseocarnosa* plantations, we identified  
185 the *Russula* ectomycorrhizal fungal communities inhabiting different life cycle  
186 stages based on MiSeq sequencing of ribosomal internal transcribed spacer (ITS)  
187 sequences of root DNA and mycosphere communities based on MiSeq sequencing  
188 of the 16S V3-V4 as well as ribosomal internal transcribed spacer (ITS) sequences  
189 of mycosphere soil DNA.

190

191 This study is the first attempt to analyze ectomycorrhizal communities of *Russula*  
192 using MiSeq sequencing metagenomics DNA of *Russula* root and the Mycorrhizal  
193 rhizosphere soil in *Russula* at different stages. We think that *Russula* shapes the  
194 ectomycorrhizosphere microbial communities of Fagaceae (*Quercus glauca* and  
195 *Castanopsis hainanensis*).

196

## 197 **RESULTS**

198 **Comparing microbiomes among types of the ECM fungus *Russula*.** ECM  
199 *Russula* was first identified by combining morph typing with Sanger sequencing  
200 DNA sequences . We analyzed internal transcribed spacer (ITS) rDNA sequences of  
201 ECM root tips and ECM rhizosphere soil samples using phylogenetic methods,  
202 operational taxonomic unit (OTU) delimitations and ordinations to compare species  
203 composition in various types of ECM *Russula*.

204 In the ECM metagenome, we found a positive correlation between the  
205 concentration of *Russula* DNA and the presence of *Russula* mycorrhizae in the  
206 mycorrhizal rhizosphere and ECM root (Tab 1). To analyze whether distinctive  
207 communities are selected by *Russula* ectomycorrhizal fungi, the fungi of ECM root  
208 microbiomes were compared and divided into three types. *Russula* that could be  
209 detected by Sanger sequencing with a DNA concentration above 10% of total ECM

210 genomic DNA, as determined by MiSeq sequencing, were classified as type 1.  
 211 *Russula* sporocarps that could be collected from the ground and the extended  
 212 hyphae of which could be connected between roots of the host and sporocarp within  
 213 50 cm, with *Russula* detected by Sanger sequencing, were classified as type 2.  
 214 *Russula* that were not detected by Sanger sequencing or with a DNA concentration  
 215 below 5% of the total ECM genomic DNA, as determined by MiSeq sequencing,  
 216 were classified as type 3. Therefore, the samples of ECM tip and rhizosphere  
 217 samplings were divided into three types: *Russula*-infected (type 1),  
 218 sporocarp-producing *Russula* (type 2), and *Russula*-uninfected (type 3) (Tab 1).  
 219 Relative *Russula* OUT abundance is significant difference in ECM *Russula*  
 220 symbiosis root and in ECM *Russula* rhizosphere, respectively (Tab 1, Fig. 1A). Type  
 221 2 is the most abundant, type 1 is the second, and type 3 is the least. Interestingly, in  
 222 type 3, the amount of *Russula* in the soil is higher than in the root. This may  
 223 indicate that in the natural growth area of *Russula*, there are a large number of  
 224 *Russula* propagules in the soil.

225 **TABLE 1** Relative *Russula* OUT abundance in three types and Alpha diversity  
 226 analysis of fungi and bacterial of three types of ECM *Russula* roots or *Russula*  
 227 rhizosphere soil in natural *Russula* growth areas

228

| Type | Relative<br>Russula<br>OUT<br>abundance<br>(%)<br>in<br>ECM | Chao1<br>richness<br>of<br>Fungi<br>Community<br>of<br>ECM<br>Russula<br>root | Shannon<br>of<br>Fungi<br>Community<br>of<br>ECM<br>Russula<br>root | Relative<br>Russula<br>OUT<br>abundance<br>(%)<br>in<br>ECM | Chao1<br>richness<br>of<br>Fungi<br>Community<br>of<br>ECM<br>Russula | Shannon<br>of<br>Fungi<br>Community<br>of<br>ECM<br>Russula<br>rhizosphere | Chao1<br>richness<br>of<br>Bacterial<br>Community<br>of<br>ECM<br>Russula | Shannon<br>of<br>Bacterial<br>Community<br>of<br>ECM<br>Russula |
|------|-------------------------------------------------------------|-------------------------------------------------------------------------------|---------------------------------------------------------------------|-------------------------------------------------------------|-----------------------------------------------------------------------|----------------------------------------------------------------------------|---------------------------------------------------------------------------|-----------------------------------------------------------------|
|------|-------------------------------------------------------------|-------------------------------------------------------------------------------|---------------------------------------------------------------------|-------------------------------------------------------------|-----------------------------------------------------------------------|----------------------------------------------------------------------------|---------------------------------------------------------------------------|-----------------------------------------------------------------|



|                   | <b>Russ</b>            |                |              | <b>Russu</b>  | <b>la</b>     | <b>phere</b> | <b>Russu</b>  | <b>Rhizo</b> |
|-------------------|------------------------|----------------|--------------|---------------|---------------|--------------|---------------|--------------|
|                   | <b>ula</b>             |                |              | <b>la</b>     | <b>rhizos</b> |              | <b>la</b>     | <b>spher</b> |
|                   | <b>root</b>            |                |              | <b>rhizos</b> | <b>phere</b>  |              | <b>rhizos</b> | <b>e</b>     |
|                   |                        |                |              | <b>phere</b>  |               |              | <b>phere</b>  |              |
| <b>Russula</b>    | <b>28.74</b>           | <b>663.12±</b> | <b>4.04±</b> | <b>20.22</b>  | <b>901.3</b>  | <b>4.52±</b> | <b>1010.</b>  | <b>7.54±</b> |
| <b>-infected</b>  | <b>±</b>               |                |              | <b>±</b>      | <b>8±</b>     |              | <b>28±</b>    |              |
| <b>(type1)</b>    |                        | <b>171.655</b> | <b>1.007</b> |               |               | <b>0.53a</b> |               | <b>0.10b</b> |
|                   | <b>19.31</b>           | <b>b</b>       | <b>b</b>     | <b>4.59B</b>  | <b>32.30</b>  |              | <b>17.29</b>  |              |
|                   | <b>B<sup>1,2</sup></b> |                |              |               | <b>a</b>      |              | <b>b</b>      |              |
| <b>Russula</b>    | <b>66.66</b>           | <b>170.44±</b> | <b>2.20±</b> | <b>39.23</b>  | <b>756.8</b>  | <b>4.56±</b> | <b>945.8</b>  | <b>7.49±</b> |
| <b>sporocarp</b>  | <b>±</b>               | <b>24.68c</b>  | <b>0.19</b>  | <b>±</b>      | <b>7±</b>     |              | <b>1±</b>     |              |
| <b>producing</b>  |                        |                | <b>c</b>     |               |               | <b>0.99a</b> |               | <b>0.049</b> |
| <b>(type2)</b>    | <b>12.92</b>           |                |              | <b>7.58C</b>  | <b>52.18</b>  |              | <b>25.08</b>  | <b>b</b>     |
|                   | <b>C</b>               |                |              |               | <b>b</b>      |              | <b>b</b>      |              |
| <b>Russula-n</b>  | <b>1.44±</b>           | <b>782.20±</b> | <b>4.55±</b> | <b>5.61±</b>  | <b>874.1</b>  | <b>4.47±</b> | <b>1099.</b>  | <b>7.94±</b> |
| <b>o-infected</b> |                        |                |              |               | <b>9±</b>     |              | <b>52±</b>    | <b>0.13a</b> |
| <b>(type3)</b>    | <b>1.02</b>            | <b>102.345</b> | <b>0.921</b> | <b>1.71A</b>  |               | <b>0.95a</b> |               |              |
|                   | <b>A</b>               | <b>a</b>       | <b>a</b>     |               | <b>41.16</b>  |              | <b>13.14</b>  |              |
|                   |                        |                |              |               | <b>a</b>      |              | <b>a</b>      |              |

229 1. mean±standard deviation ; type1 has 4 repeats, type2 has 2 repeats and type3 has  
230 3 repeats.

231 2. Analysis of variance by one-way analysis of variance In each column: different  
232 words indicate differences, uppercase letters indicate extremely significant  
233 differences (P <0.01); and lowercase letters indicate significant differences (P  
234 <0.05)

235 **Fungal diversity analysis and analysis of indicator species associated with**  
236 **ECM *Russula* roots.** In total, 1346 fungal operational taxonomic units (OTUs)  
237 were distinguished in roots. Among the three types, the Chao1 diversity index and  
238 Shannon diversity index decreased in sporocarp-producing *Russula* type (type 2)

239 and *Russula*-infected type (type 1) compared to the *Russula*-uninfected (type 3)  
240 (Tab 1). The result shows that species richness shifted in the composition of the  
241 ECM community associated with *Russula*. The fungal community composition and  
242 the abundance of the main fungi ( over 0.05% fungi in roots genome) were different  
243 in the three *Russula* types roots (Fig. 1A, Tab 1). The result shows that *Russula* is  
244 dominates in fruiting bodies (type 2) and infected samples (type 1) though *Russula*  
245 in three type samples.

246 Based on the top 20 fungi of each sample, we first obtained the common species of  
247 three types after intersecting each type with the Venny mapping tool: 14 species  
248 were in type 2, 5 in type 2 and 3 in type 3 (Tab S1). Then, we intersected the  
249 common types of three types with the Venny mapping tool. At the genus level, the  
250 three types shared 3 common genera: *Russula*, *Tomentella* and *Lactarius* (Tab S2,  
251 Fig. 1B). These results showed that these are common fungi in Fagaceae ECM roots.  
252 Types 1 and 2 shared 2 common genera: *Acremonium* and *Cladophialophora* , in  
253 addition to the abovementioned three common ECM (Tab S2, Fig. 1B). Second, We  
254 take a collection of three types genera respectively, subsequently we intersected the  
255 collection of three types by the Venny mapping tool (Fig. 1C): 24 species in type 2,  
256 46 in type 1 and 41 in type 3, and 5 genera were exclusively in type 2 collection.  
257 We take the intersection of the unique collection (9 genera) and union (5 genera ) in  
258 type 2, and found only one species *Boletus* (Fig. 1D , Tab. 2). Analyze fungi  
259 composition differences of three types roots by PCoA based on the top 20 fungal  
260 genera , we found that the control (type 3) belonged to quadrant IV, type 1 belonged  
261 to quadrant I or II, and type 2 belonged to quadrant III (Fig. 1F). The results show  
262 that the fungal community of sporocarp- producing *Russula* was completely  
263 different from that of *Russula*-uninfected . The *Russula*-infected type was in the  
264 transitional phase. We suggest the *Russula* infection contributed 31.3% and others  
265 elements host contributed 20.5% of the differences, respectively. *Boletus* was the  
266 only ECM with the emergence of *Russula* fruit bodies. In all, *Boletus* may be  
267 considered an indicator species in the *Russula* sporocarp-producing fungal  
268 community, and *Acremonium* and *Cladophialophora* may be considered indicator

269 species in *Russula* symbiosis fungal communities (Tab. 2). Analyze the different  
270 effects of ECM species by PCoA based on the top 20 fungal genera, we found  
271 *Tomentella*, *Xylogone*, and *Lactarius* belonged to I, II, while others belonged to  
272 quadrant III, V (Fig. 1E). The *Russula* infection contributed 55% and others  
273 elements contributed 24% of the differences, respectively. Combining these two  
274 factors, it shows *Russula* and *Elaphomyces* can be divided into one categories,  
275 while *Xylogone* can be divided into another category functionally. So we assume  
276 that *Elaphomyces* are benefit for *Russula* symbiosis while  
277 *Tomentella*, *Xylogone*, and *Lactarius* has the function of competing hosts.

278

279 A

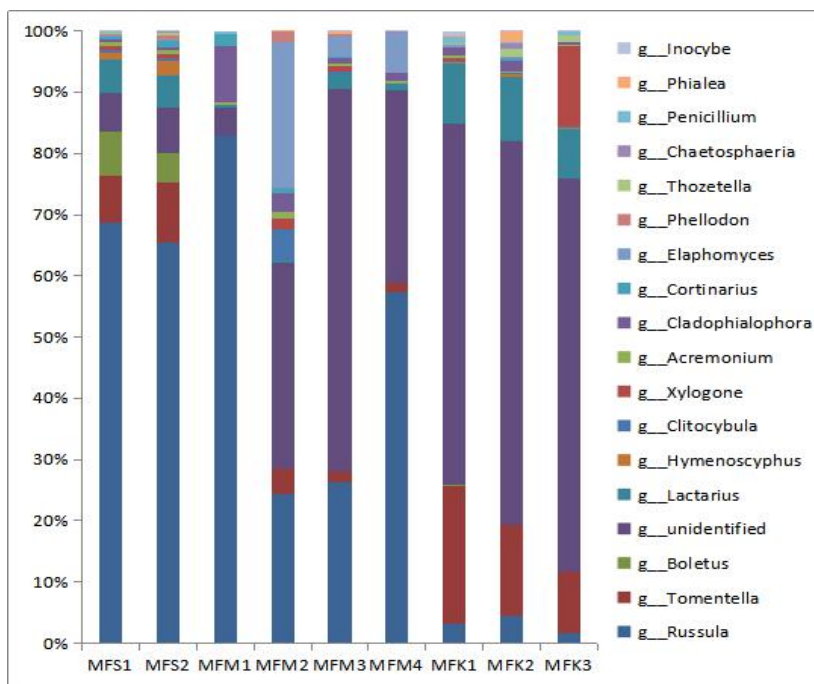

290

291

292

293

294

295

296

297 B

298

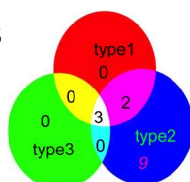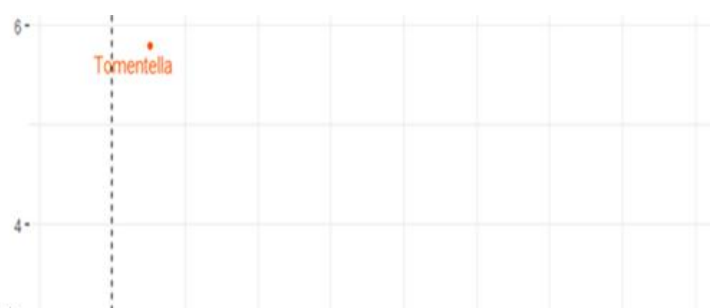

299

300

301

302 **C**

303

304

305

306

307

308 **D**

309

310

311

312

313

314

315

316 **F**

317

318

319

320

321

322

323

324

325

326

327 *Russula* symbiosis root

328 C: The Venny mapping of the collection genus of the top 20 fungi genus in three

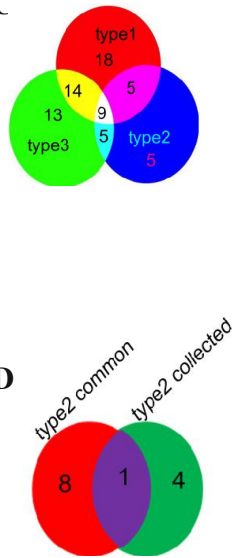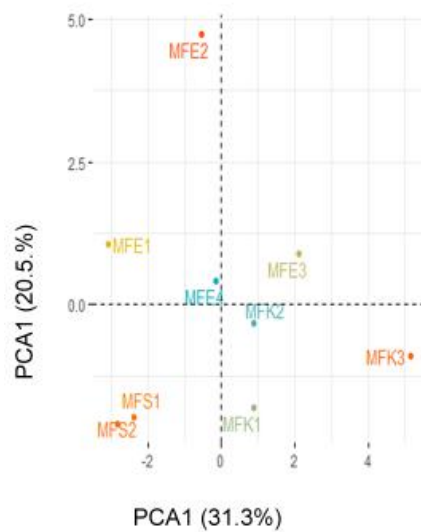

Fig. 1 Diversity analysis of fungi of three types of *Russula* symbiosis roots in natural *Russula* growth areas

A: The main fungi genus composition and abundance in type2 *Russula* symbiosis root and the corresponding genus are in the other two types

B: The Venny mapping of the common genus of the top 20 fungi genus in three types

329 types *Russula* symbiosis root

330 D: The Venny mapping of the common genus and the collection genus of the top 20

331 fungi genus in type2 *Russula* symbiosis root

332 E : Analysis of ECM role difference of three types *Russula* symbiosis root on top 20

333 fungi genus of ECM *Russula* by PCoA

334 F :Analysis of composition difference of three types *Russula* symbiosis root on top

335 20 fungi genus of ECM *Russula* by PCoA

336 In Eand F: The scales of the horizontal and vertical axes are relative distances and

337 have no practical significance. The contribution rate is the degree of interpretation,

338 and the hypothetical factors can be evaluated and verified.

339 In A,Eand F :In the sample name, the first letter M indicates mycorrhizal root ; first

340 second F stands for fungi; the third letter different treatment :S indicates

341 sporocarp(type2), E indicates ECM ectomycorrhizal(type1) , K indicates

342 control(type3) respectively; the fourth number indicates the different biological

343 repetitions of different treatment .

344

345 **Fungal diversity analysis and analysis of indicator species associated with**

346 **ECM *Russula* rhizosphere soil.** In total, 1829 fungal operational taxonomic units

347 (OTUs) were distinguished in rhizosphere soil. Interactions with native

348 ectomycorrhizal fungi present in the soil play a key role in the higher diversity of

349 fungal taxa .Compared to type 1 and 3, the Chao1 diversity index decreased in

350 types 2 ; while there were no significant differences between types 1 and 3 (Tab. 1).

351 But, the Shannon diversity index showed no significant differences in three types

352 (Tab. 1). The fungal community composition and

353 A

354

355

356

357

358

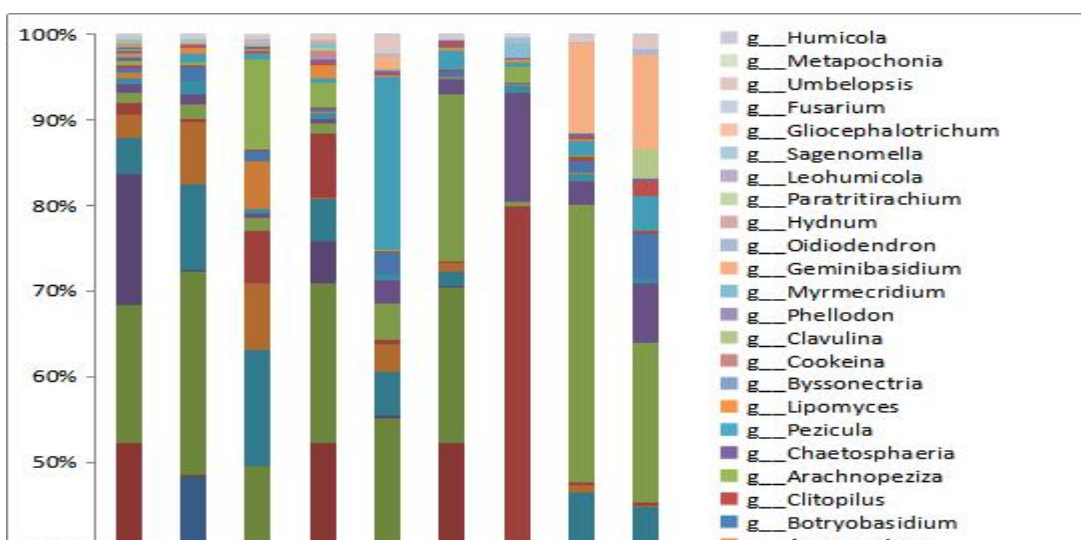

359

360

361

362

363

364

365

366

367

368

369

370

371

372

373

374

375

376

377 B

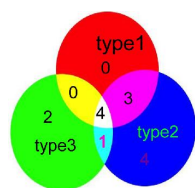

380

381 C

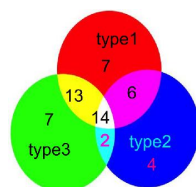

384

385

386

387

388 D

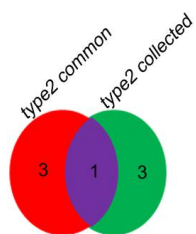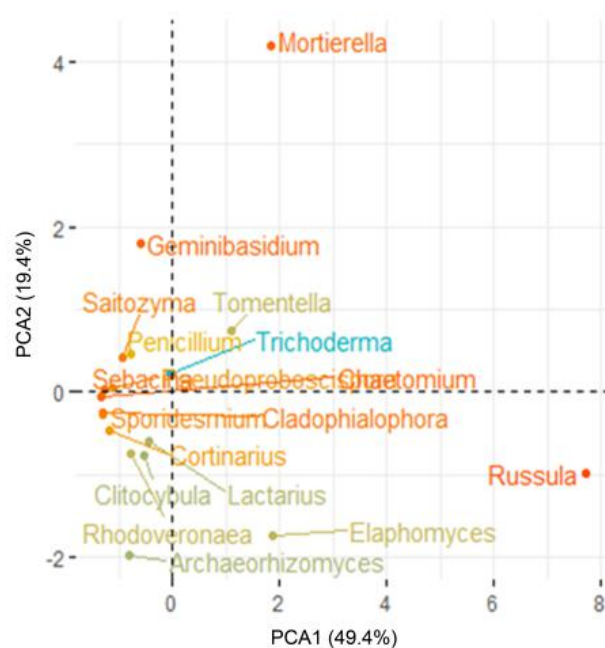

389

390

391

392

393

394 F

395

396

397

398

399

400

401

402

403

404

405

406

407

408

409

410

411

412

413

414

415

416

417

418

F

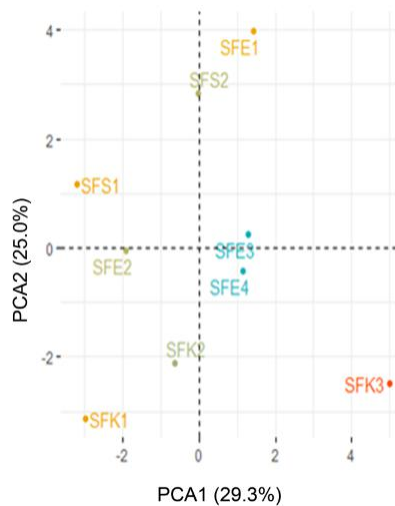

Fig. 2 Diversity analysis of fungi of three types *Russula* mycorrhizal rhizosphere in natural *Russula* growth areas

A: The top 20 fungi genus composition and abundance in type2 *Russula* symbiosis mycorrhizal rhizosphere and the corresponding genus are in the other two types in at Fujian, China

In the sample name, the first letter S indicates mycorrhizal root soil ; first second F stands for fungi; the third letter different treatment :S indicates sporocarp, E indicates ECM ectomycorrhizal , K indicates control respectively; the fourth number indicates the different biological repetitions of different treatment .

B: The Venny mapping of the common genus of the top 20 fungi genus in three types *Russula* symbiosis Mycorrhizal rhizosphere

C: The Venny mapping of the collection genus of the top 20 fungi genus in three types *Russula* symbiosis Mycorrhizal rhizosphere

D: The Venny mapping of the common genus and the collection genus of the top 20 fungi genus in type2 *Russula* symbiosis Mycorrhizal rhizosphere

E : Analysis of ECM role difference of three types *Russula* symbiosis mycorrhizal rhizosphere on top 20 fungi genus of ECM *Russula* by PCoA

F : Analysis of composition difference of three types *Russula* symbiosis mycorrhizal rhizosphere on top 20 fungi genus of ECM *Russula* by PCoA

In E and F: the scales of the horizontal and vertical axes are relative distances and have no practical significance. The contribution rate is the degree of interpretation,

419 and the hypothetical factors can be evaluated and verified.

420 the abundance of the main fungi ( over 0.05% fungi in soil genome )were different  
421 in the three *Russula* types rhizosphere soil (Fig. 1A,Tab 1).Compared to the  
422 root ,The result shows that *Russula* is also dominates in fruiting bodies (type 2) and  
423 infected samples(type 1) though *Russula* in three type samples(Fig. 1A,Fig. 2A).  
424 However,compared to the root ,the genera variety increased (Fig. 1A,Fig. 2A).

425 The community composition of the top 20 fungi in the three *Russula* rhizosphere  
426 soil types was analyzed (Tab. S2). We first obtained the common species of three  
427 types after intersecting each type using the Venny mapping tool: 12 species in type  
428 2, 7 species in type 1 and 7 species in type 3 (Fig. 2B). Then, we intersected the  
429 common types of the three types with the Venny mapping tool. At the genus level,  
430 the three types shared 4 common genera: *Russula*, *Mortierella*, *Penicillium* and  
431 *Trichoderma*; and *Russula* also had a large frequency in types 1 and 2 (Fig. 2B).  
432 This showed that 4 genera are common fungi in Fagaceae-dominant rhizosphere  
433 soil. Types 1 and 2 shared 3 common genera: *Elaphomyces*, *Tomentella* and  
434 *Saitozyma* ,in addition to the abovementioned 4 common genera(Fig. 2B). Second,  
435 we take a collection of three types genera respectively, subsequently intersected the  
436 collection of three types by the Venny mapping tool (Fig. 2C): 26 species in type 2,  
437 40 in type 1 and 36 in type 3; 4 genera were included exclusively in the type 2  
438 collection. We take the intersection of the unique collection (4 genera) and union (4  
439 genera ) in type 2, and found *Dacryobolus* unique belonged to type 2 (Fig. 2D, Tab.  
440 2). The top 20 fungal genera in the sporocarp-producing *Russula* root rhizosphere  
441 with types 3 or types 1 were compared. The result shows that *Russula* EMM is  
442 dominates in fruiting bodies (type 2) and infected samples (type 1) though *Russula*  
443 in three type samples. *Elaphomyces* also dominated in types 1 and 2, but nearly did  
444 not exist in the control, type 3 (Fig. 2D). In all, *Dacryobolus* may be considered an  
445 indicator species of sporocarp-producing *Russula* in the *Russula* rhizosphere.  
446 *Elaphomyces*, and *Tomentella* may be considered indicator species for *Russula*  
447 symbiosis in the rhizosphere (Tab. 2). Analyze three types of fungi composition  
448 differences of top 20 genera by PCoA in *Russula* rhizosphere soil based on the top



449 20 fungal genera, we found that type 2 belonged to quadrant II and type 1 belonged  
450 to quadrants I, III and IV, while type 3 belonged to quadrants III and IV, down the  
451 horizontal axis (Fig. 2E). The host and *Russula*-infection contributed 29.3% and  
452 25.0%, respectively. Furthermore, analyzing the different effects of fungi species by  
453 PCoA, we found *Russula* and *Elaphomyces* belonged to quadrant IV, *Mortierella*  
454 and *Tomentella* belonged to quadrant I, *Trichoderma*, *Penicillium*, *Geminibasidium*  
455 and *Saitozyma* belonged to quadrant II, while others belonged to quadrant III (Fig.  
456 2E). The *Russula* infection contributed 49.4% and others elements host contributed  
457 19.4% of the differences, respectively. Combining these two factors, we assume  
458 that *Elaphomyces* in soil are benefit for *Russula* symbiosis.

459

460 **Bacterial diversity analysis and analysis of indicator species associated with**  
461 **ECM *Russula* rhizosphere soil.** In total, 1494 bacterial operational taxonomic  
462 units (OTUs) were distinguished in this study. Compared to type 3, the Chao1  
463 diversity index decreased in types 1 and 2 (Tab. 1). There were significant  
464 differences between type 3 and the other two types. However, there were no  
465 significant differences between types 1 and 2. The Shannon diversity index showed  
466 the same tendency as the Chao1 diversity index (Tab. 1). The bacterial community  
467 composition and the abundance of the main bacterial (the over 0.05% bacteria in  
468 soil genome) were analyzed (Fig. 3A). About 40-60% of the species in the sample  
469 cannot be identified by Illumina MiSeq high-throughput sequencing and the  
470 remaining bacterial genera in the sporocarp-producing *Russula* root rhizosphere soil  
471 were showed for the three types (Fig. 3A). Compared to the fungi of the root and  
472 rhizosphere soil, the bacterial genera variety still increased (Fig. 1A, 2A, 3A).

473 The community composition of the top 20 f bacteria in the three *Russula*  
474 rhizosphere soil types was analyzed (Tab. S3). We first obtained the common  
475 species of the three types after intersecting each type with the Venny mapping tool:  
476 18 species in type 2, 14 in type 1 and 12 in type 3 (Fig. 3B). Then, we intersected  
477 the common types of the three types with the Venny mapping tool. At the genus  
478 level, the three types shared 10 common genera: *Acidibacter*, *Candidatus*,

479 *Rhizomicrobium*, *Acidothermus*, *Variibacter*, *Burkholderia*, *Roseiarcus*,  
480 *Bradyrhizobium*, *Candidatus* and *Granulicella*. (Fig. 3B). This showed that 10  
481 genera are common bacteria in Fagaceae-dominant rhizosphere soil. Types 1 and 2  
482 shared 4 common genera: *Bryobacter*, *Sorangium*, *Acidicaldus*, and  
483 *Acidobacterium* ,in addition to the abovementioned 10 common genera(Fig. 3B).  
484 Second, we obtained the collection of the various types: 20 species in type 2, 27 in  
485 type 1 and 26 in type 3 (Fig. 3C,Tab S3). Then, the unique genera were analyzed of  
486 the unique collection (4 genera) and union (3 genera ) in type 2 by the Venny  
487 mapping tool, and 2 genera *Acidocella* and *Edaphobacter* were found (Fig. 3D). In  
488 all, *Acidocella* ,*Edaphobacter* may be considered indicator species for  
489 sporocarp-producing *Russula*, and *Bryobacter*, *Sorangium*, *Acidicaldus*, and  
490 *Acidobacterium* can be considered indicator species for *Russula* symbiosis in the  
491 bacterial community (Tab. 2). By PCoA based on the top 20 fungal genera, we  
492 found that type 2 belonged to quadrant III , left of the vertical axis. Except for one  
493 sample, other samples of type 1 belonged to quadrants II or III, left of the vertical  
494 axis . Type 3 belonged to the right of the vertical axis (Fig. 3F). We assume that the  
495 *Russula* infection and host contributed 47.3% and 21.4%, respectively(Fig. 3F).  
496 Analyze the different effects of bacteria species by PCoA , we found *Acidocella*,  
497 *Sorangium*, *Haliangium* , *Telmatospirillum* , *Edaphobacter* , *Acidobacterium* ,  
498 *Sphingomonas*, *Candidatus\_Koribacter* , *Roseiarcus* , *Granulicella* and *Acidicaldus*  
499 belonged to quadrant II, III , while the others belonged to quadrant I, IV (Fig. 3E).  
500 It shows 11 gengus in quadrant II, III can be divided into one categories by role. All  
501 indicator species for sporocarp-producing *Russula* or *Russula* symbiosis in the same  
502 categories but *Bryobacter*. We assume that the *Russula* infection contributed  
503 80.9% and others elements contributed 10.5% respectively. Combined with  
504 indicator species analysis, we assume that 11 bacterial gengus beneficial to the  
505 symbiosis of *Russula*.

506

507

508

509

510

511

512

513

514 A

515

516

517

518

519

520

521

522

523

524

525

526

527

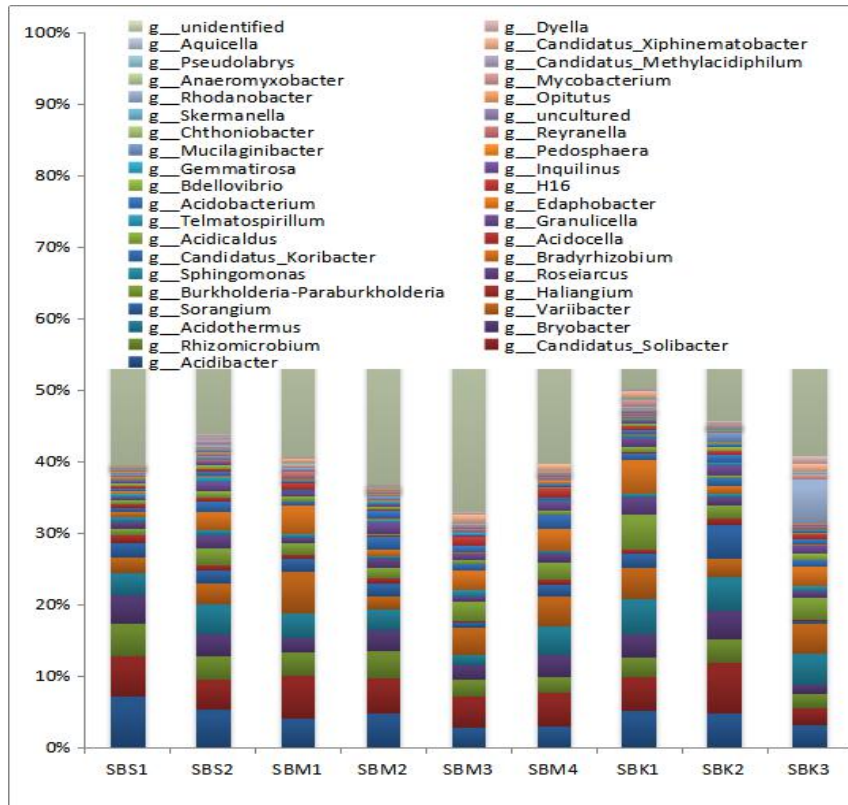

528

529

530

531

532

533

534

535

536 B

537

538

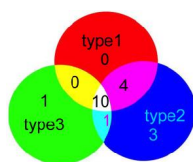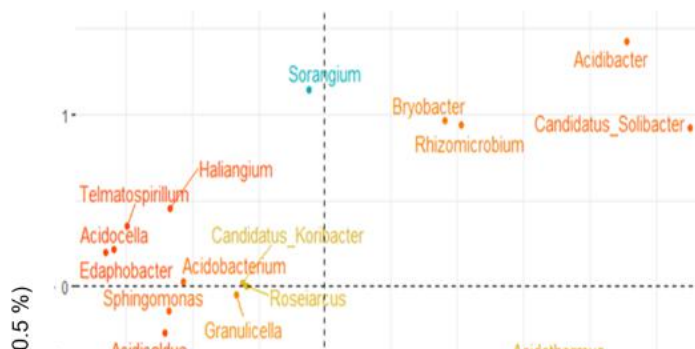

539

540

541

542

543

544

545

546

547

548

549 C

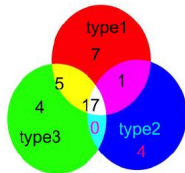

550

551

552

553

554

555

556

557

558 D

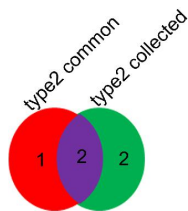

559

560

561

562

563

564

565

566

567

568

F

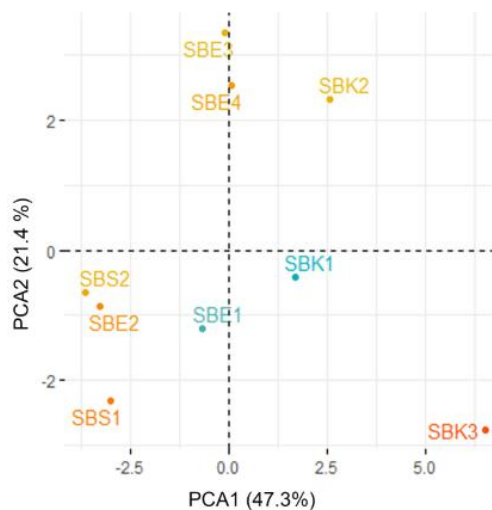

Fig. 3 Diversity analysis of bacterial of three types *Russula* Mycorrhizal rhizosphere in natural *Russula* growth areas

A: The top 20 bacterial genus composition and abundance in type2 *Russula* symbiosis mycorrhizal rhizosphere and the corresponding genus are in the other two types in natural *Russula* growth areas , Fujian, China

569 In the sample name, the first letter s indicates mycorrhizal root soil; first second b  
 570 stands for bacteria; the third letter different treatment :S indicates sporocarp, E  
 571 indicates ECM ectomycorrhizal , K indicates control respectively; the fourth  
 572 number indicates the different biological repetitions of different treatment .

573 B: The Venny mapping of the common genus of the top 20 bacterial genus in three  
 574 types *Russula* symbiosis Mycorrhizal rhizosphere

575 C: The Venny mapping of the collection genus of the top 20 bacterial genus in three  
 576 types *Russula* symbiosis Mycorrhizal rhizosphere

577 D: The Venny mapping of the common genus and the collection genus of the top  
 578 20 bacterial genus in type2 *Russula* symbiosis Mycorrhizal rhizosphere

579 E: Analysis of 20 bacterial genus role difference of three types *Russula* symbiosis  
 580 mycorrhizal rhizosphere on top 20 bacterial genus of ECM *Russula* by PCoA

581 F : Analysis of composition difference of three types *Russula* symbiosis  
 582 mycorrhizal rhizosphere on top 20 bacterial genus of ECM *Russula* by PCoA

583 In E and F: The scales of the horizontal and vertical axes are relative distances and  
 584 have no practical significance. The contribution rate is the degree of interpretation,  
 585 and the hypothetical factors can be evaluated and verified.

586

587 **Table 2** Indicator species of fungi and bacterial community of *Russula*  
 588 Mycorrhizal based on the top 20 genus

|              | Common species in three types                   | Common species in type1 and type2, Excluding those that are common to all three types | species included exclusively in Type 2, comparing to collecting Type 1,3; and belong to Common in type2 |
|--------------|-------------------------------------------------|---------------------------------------------------------------------------------------|---------------------------------------------------------------------------------------------------------|
| Fungi of ECM | <i>Tomentella,</i><br><i>Lactarius, Russula</i> | <i>Acremonium,</i><br><i>Cladophialophora</i>                                         | <i>Boletus</i>                                                                                          |

|             |                                     |                                        |                     |
|-------------|-------------------------------------|----------------------------------------|---------------------|
| Russula     |                                     |                                        |                     |
| root        |                                     |                                        |                     |
| Fungi of    | <i>Russula</i> , <i>Mortierella</i> | <i>Elaphomyces</i> ,                   | <i>Dacryobolus</i>  |
| Russula     | <i>a</i> , <i>Penicillium</i>       | <i>Tomentella</i>                      |                     |
| Mycorrhizal | <i>Trichoderma</i>                  |                                        |                     |
| rhizosphere |                                     |                                        |                     |
| e           |                                     |                                        |                     |
| Bacterial   | <i>Acidibacter</i> ,                | <i>Bryobacter</i> , <i>Sorangium</i> , | <i>Acidocella</i> , |
| of Russula  | <i>Acidothermus</i> ,               | <i>Acidicaldus</i> ,                   | <i>Edaphobacter</i> |
| Mycorrhizal | <i>Candidatus_Soliba</i>            | <i>Acidobacterium</i>                  |                     |
| rhizosphere | <i>cter</i> ,                       |                                        |                     |
| e           | <i>Rhizomicrobium</i> ,             |                                        |                     |
|             | <i>Variibacter</i> ,                |                                        |                     |
|             | <i>Burkholderia-Para</i>            |                                        |                     |
|             | <i>burkholderia</i> , <i>Rosei</i>  |                                        |                     |
|             | <i>arcus</i> ,                      |                                        |                     |
|             | <i>Bradyrhizobium</i> ,             |                                        |                     |
|             | <i>Candidatus_Koriba</i>            |                                        |                     |
|             | <i>cter</i> , <i>Granulicella</i>   |                                        |                     |

589 Type2:Russula sporocarp producing; type1 :Russula –infected;  
 590 type3 :Russula-no-infected; If one species is with one type and without the other  
 591 type, then the species is assumed as the indicator of the type based on the top 20  
 592 genus.

593

594 **Interaction of fungi and bacteria with ECM *Russula* root and mycorrhizal**  
 595 **rhizosphere**

596 By network net, we analyzed the interaction of the top 20 fungal OTUs of *Russula*  
 597 rhizosphere soil and ECM *Russula* root, including 7 *Russula* OTUs( MSFH OTU\_1,

598 MSFH OTU\_3, MSFH OTU\_4, MSFH OTU\_16, MSFH OTU\_21, MSFH OTU\_24  
599 and SMFH OTU\_1639) (Table S7), five indicator species(MSFH OTU\_19  
600 *Elaphomyces*, MSFH OTU\_9 *Tomentella*\_sp, MSFH OTU\_655 *Tomentella*\_sp,  
601 MSFH OTU\_6 *Elaphomyces*, and MSFH OTU\_5 *Tomentella*\_sp).  
602 *Russula*, which interacted with other species in positive ways, was the  
603 representative and contributed to the main ECM in the community. For example,  
604 the interaction result predicted that many fungi had a positive correlation with  
605 *Russula* (Fig.4A, Table S4), MSFH OTU\_19 (*Elaphomyces*) and MSFH OTU\_5  
606 (*Tomentella*\_sp) with the *Russula rosea*; MSFH OTU\_21, MSFH OTU\_655  
607 (*Tomentella*\_sp) and MSFH OTU\_5 with *Russula* sp. In all, *Elaphomyces*\_sp,  
608 *Tomentella*\_sp have a positive correlation with *Russula*, combining the previous  
609 results that *Elaphomyces* and *Tomentella* were considered indicator species for  
610 *Russula* symbiosis in the *Russula* rhizosphere based on the top 20 genera (Tab. 2).  
611 Therefore, we further assume that the indicators *Elaphomyces* and *Tomentella* have  
612 a positive correlation with *Russula* symbiosis.that

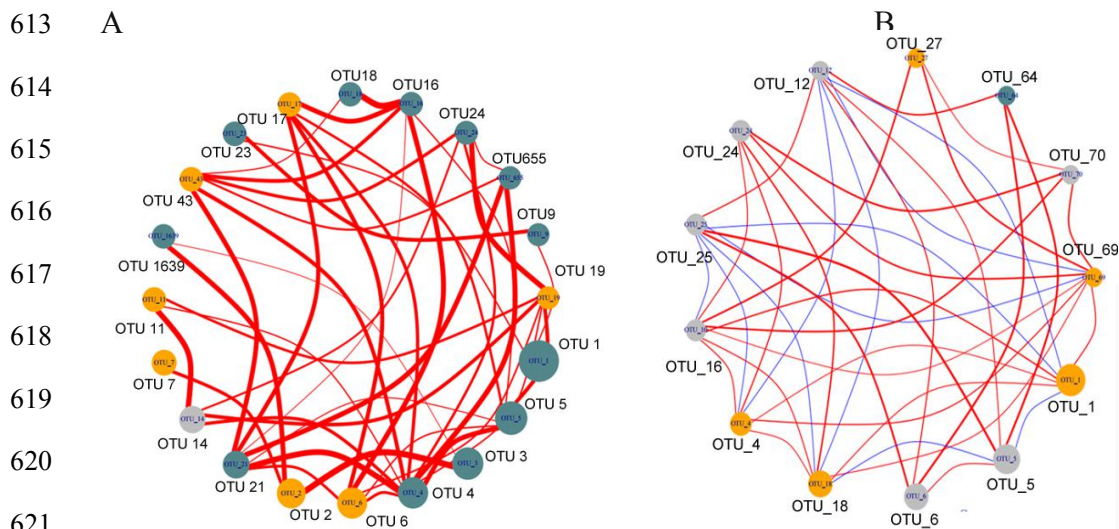

Fig. 4 Interaction of indicator species with the top 20 fungi and bacterial OTUs in

628 community of *Russula* mycorrhizal

629 A: Interaction of fungi in *Russula* ECM root and *Russula* mycorrhizal rhizosphere

630 B: Interaction of bacterial in *Russula* mycorrhizal rhizosphere

631 In A and B: The size of the dots represents the abundance, the color of the dots  
632 represents the phylum (In A : Orange represents p\_\_Ascomycota, blue represents  
633 p\_\_Basidiomycota, gray represents p\_\_Mortierellomycota; in B: gray represents  
634 p\_\_Proteobacteria, Orange represents p\_\_Acidobacteria, blue represents  
635 p\_\_Actinobacteria), the thickness of the lines represents the magnitude of the  
636 correlation, and the red line indicates a positive correlation, the blue color indicates  
637 a negative correlation.

638 Meanwhile, we analyzed the relationship of the top 20 bacterial OTUs in *Russula*  
639 rhizosphere soil by Network net. Only 15 bacterial OTUs were included in the  
640 network net (Fig. 4B, Table S5). Among the top 15 bacterial OTUs, there is 1 OTUs  
641 SBH OTU\_70 *Sorangium* belonging to indicator species. The network net  
642 suggested that SBH OTU\_70 was positive with SBH OTU\_16 (Acidobacteriaceae),  
643 24(Caulobacteraceae), 27(Solibacteraceae), 69(Solibacteraceae). Another indicator  
644 species *Acidobacterium* was't within network net . Therefore, we further assumed  
645 that *Sorangium* and other OTUs (Acidobacteriaceae, Caulobacteraceae,  
646 Solibacteraceae) have a positive correlation with *Russula* .

## 647 **DISCUSSION**

648 The complete exclusion of other species by any single species could be prevented  
649 by either fluctuation in the environment, by seasonal root production or by the  
650 presence of microbiome competitive networks, the situation in which no single  
651 species is competitively superior to all other species. So, we usually obtain 1 ECM  
652 species or 2 ECM species by Sanger sequencing of the root sample with  
653 basidiomycete-specific primers. The introduction of high-throughput sequencing  
654 techniques, metagenomics or environmental genomics has provided new  
655 information on ECM fungal communities by 'barcodes' of ITS regions in several  
656 biomes/ecosystems, e.g., truffle grounds (57) and ECM roots in the Svalbard(58).  
657 In this study, we found that *Russula* cannot successfully infect roots if the amount



658 of *Russula* in the mycorrhizal rhizosphere is less than 10% by MiSeq sequencing  
659 (Table 1, part data not shown). Although ECM fungi infection have been detected in  
660 nonproductive plots, the amount was not sufficient to shift from vegetative growth  
661 to fruit body. *Russula* can form a fruiting body, only when *Russula* infection could  
662 be detected by Sanger sequencing of ECM roots, contemporary the relative  
663 abundance of its DNA was greater than 60% by MiSeq sequencing. Compared to  
664 control, we found significantly more *Russula* DNA in *Russula* sporocarps  
665 rhizosphere soil or *Russula* symbiosis rhizosphere soil, above 15% amount of the  
666 metagenomics of rhizosphere soil. Zampieri et al.(2012) (49) detected significantly  
667 more *T. melanosporum* DNA in truffle productive plots of soil. Zhou et al. (2001)  
668 (50) also demonstrated that the development of *S.grevillei* sporocarps is correlated  
669 with that of extraradical mycelia, which are distributed in a narrow area. So , we  
670 suggest that to the type 2(sporocarps-producing) ,there is congruence of the above-  
671 sporocarps and belowground root or mycorrhizospheres soil DNA for *Russula*.  
672 However, interestingly, in type 3(uninfected), the amount of *Russula* in the soil is  
673 higher than in the root. This may indicate that in the natural growth area of *Russula*,  
674 there are a large number of *Russula* propagules in the soil. Whether the *Russula*  
675 propagules naturally in the soil of the natural growth area can colonize to the host  
676 or not depends on other factors.

677 Fewer species were detected in *Russula* productive root than in nonproductive root,  
678 which is consistent with French *truffle* grounds. *T. melanosporum* grounds also  
679 have shown a reduced fungal biodiversity, a reduced presence of both ECM  
680 Basidiomycota (57). Truffle-colonization reduced the abundance of some fungal  
681 genera surrounding the host tree, such as *Acremonium* (55) . *Russula* fruiting body  
682 decreased the Chao richness bacterial index and Shannon diversity of bacterial  
683 index in rhizosphere soil. Simultaneously, *Russula* fruiting body decreased the  
684 Chao richness fungi index but no effect on Shannon diversity of fungi index in  
685 rhizosphere soil. Warmin (2009)(40) found bacteria adapted to the mycospheres of  
686 three or more or just one ECM fungal species was defined as specific selective  
687 bacterial. So, we suggest the diversity decreased phenomenon may be related with

688 the *Russula* sporocarp selection effect, especially to rhizosphere soil bacterial.  
689 Temperate forests are generally dominated by Fagaceae, and species in these plant  
690 families form mycorrhizae with various phylogenetic clades of ectomycorrhizal  
691 fungi(8, 11, 59). Members of the *helotialean* group have recently been identified as  
692 the dominant species in the roots of Fagaceae trees in the temperate and subtropical  
693 forests of Japan (60, 61). In our study, we found that 3 ECM, *Russula*, *Tomentella*,  
694 and *Lactarius*, are the main members in the natural Fagaceae (*Quercus glauca* and  
695 *Castanopsis hainanensis*)-dominant *Russula* ground in all the types. This result is  
696 consistent with the preference of *Russula* and *Lactarius* for the Fagaceae host. In  
697 *Castanopsis*-dominant forest in Japan (62), there are ECM fungi such as *Amanita*  
698 (*Amanitaceae*), *Boletus* (*Boletaceae*), *Tylopilus* (*Boletaceae*), *Cortinarius*  
699 (*Cortinariaceae*), *Inocybe* (*Inocybaceae*), *Lactarius* (*Russulaceae*), and *Russula*  
700 (*Russulaceae*). The dominant ECM lineages of *Quercus liaotungensis* were  
701 *Tomentella*, *Thelephora*, *Cenococcum*, *Russula*, *Lactarius* and *Inocybe*(63). The  
702 ectomycorrhizal *Russula*, *Lactarius*, *Cortinarius*, *Tomentella*, *Amanita*, *Boletus* and  
703 *Cenococcum* were dominant in the *Quercus serrate* plot (11). *R. vinosa* grows in  
704 tropical and subtropical evergreen forests in southern China dominated by trees of  
705 *Castanopsis* spp., and *R. griseocarnosa* grows in forests with Fagaceae (13). Given  
706 commercially harvested truffles can establish ectomycorrhizal relationships with  
707 different woody host species, and many different combinations of truffle and host  
708 species mycorrhizal seedlings are produced in nurseries (64). Our study shows that  
709 *Russula* inoculation may establish satisfactory ectomycorrhizal relationships with  
710 two indigenous tree species, *Quercus glauca* and *Castanopsis hainanensis*.

711

712 Healthy ECM can support a wide variety of organisms, including a diverse array of  
713 fungi other than the dominant ectomycorrhizal symbiont. Some pathogenic fungi,  
714 including *Ilyonectria* and *Podospora*, and other competitive mycorrhizal fungi,  
715 such as *Hymenochaete*, had significantly lower abundance in the *T.*  
716 *borchii*-inoculated root and *Trechispora* and *Humicola*, which were more abundant  
717 in the *T. borchii*-inoculated root. There are some notable examples of associations

718 among *suilloid* fungi and members of the Gomphidiaceae occur within  
719 ectomycorrhizal roots (27). Olsson considered *Gomphidius roseus* acted as a  
720 parasite of *Suillus bovinus*, the former never occurs without the latter(27) , Based  
721 on MiSeq sequencing analysis of the top 20 ectomycorrhizal fungi in *Russula* root,  
722 we found *Acremonium*; *Cladophialophora* are associated with ECM  
723 *Russula*-Fagaceae roots, and *Boletus* was in association with sporocarp-producing  
724 *Russula*. Meanwhile, based on the top 20 genera in *Russula* rhizosphere soil, we  
725 found that *Elaphomyces*, and *Tomentella* in association with *Russula* symbiosis;  
726 *Dacryobolus* were associated with sporocarp-producing *Russula*. The result will  
727 help to find and develop PGPF for *Russula* symbiosis or sporocarp-producing.

728

729 Many studies have addressed the role of soil bacteria in establishing the symbiotic  
730 relationship between plants and mycorrhizal fungi (43, 65). We found differences in  
731 fungal genus among the three ECM *Russula* types in rhizosphere soil (Table S 3,  
732 Table 2).The interactions of bacteria with the dense hyphal network underneath  
733 fungal fruiting bodies have also been addressed (44, 66). Differences in bacterial  
734 communities associated with the mycorrhizospheres of *Suillus bovinus*- and  
735 *Paxillus involutus*-colonized plants were detected early (67, 68). Frey et  
736 al.(1997)(69) reported that specific *Pseudomonas fluorescens* prefer *Laccaria*  
737 *laccata*. *P.fluorescens* and *Burkholderia terrae* are exclusively found in the  
738 mycosphere soil of *Laccaria proxima* (30, 40). Boersma(2009)(36) found that the  
739 mycospheres of basidiomycetous fungi indeed exerted a universal selective effect  
740 on the *Pseudomonas* community (i.e., *Pseudomonas poae*, *P. lini*, *P. umsongensis*, *P.*  
741 *corrugata*, *P. antarctica* and *Rahnella aquatilis*); as well as species-specific  
742 selective (i.e. *P. viridiflava* and candidatus *Xiphinematobacter americani*). For the  
743 selection of the bacteria family *Sphingomonadaceae* by the mycorrhizal fungi *L.*  
744 *proxima* and *R. exalbicans*, the mycosphere effect was most prominent in the latter  
745 (36). The mycosphere-isolated bacterium *Burkholderia terrae* has been shown to  
746 protect its fungal host *Lyophyllum* sp. from several antifungal agents, such as  
747 metabolites produced by *P. fluorescens*, as well as from the antifungal agent

748 cycloheximide (70). Some studies have concentrated on mycorrhization helper  
749 bacteria (MHB) in facilitating mycorrhizal colonization of roots in forest nursery  
750 environments(43, 71). Rich in bacteria in the mycorrhizal roots, mycorrhizosphere  
751 soil and peridium of desert truffles may be used to increase the survival and  
752 mycorrhization in the desert truffle plant production system at a semi-industrial  
753 scale(72) . The associated bacteria of *Truffle brûlés* are *Pseudomonas* and  
754 *Flavobacteriaceae* (73). To achieve successful reforestation, PGPR and MHB were  
755 screened to improve the establishment of *Lactarius deliciosus*-*Pinus* sp.  
756 symbiosis(74). In our study, *Acidocella* , *Bryobacter*, *Sorangium*, *Acidicaldus*,  
757 *Edaphobacter* and *Acidobacterium* were indicator species for *Russula* symbiosis in  
758 the bacterial community. we also found ECM universal selective  
759 *Sphingomonadaceae* work with *Russula* species-specific selective  
760 *Acidocella* ,*Sorangium*, *Acidicaldus*, *Edaphobacter* and *Acidobacterium* in the soil  
761 bacterial community of *Russula* symbiosis (Fig. 3E).Further, by network analysis,  
762 *Acidobacteriaceae*, *Sorangium* and *Acidobacteria* had a positive correlation with  
763 *Russula*. There may be further instruction to provide a wide collection of these  
764 bacterial associates of *Russula* and to develop *Russula* MHB or Fagaceae PGPR.

765

766 Only a few edible ectomycorrhizal fungal species, such as black truffles or saffron  
767 milk caps, can be produced in manufactured orchards. To date, *Russula* fruit bodies  
768 are uncultivable. Five *Russula* were used to inoculate *Shorea parvifolia* seeding  
769 successfully (75) , and one *Russula* was used to inoculate *Quercus garryana*  
770 seeding successfully(76) . Our results will provide instruction to specifically isolate  
771 the fungi or beneficial rhizosphere microbes associated with ECM *Russula* from the  
772 root or mycorrhizal rhizosphere. Next , we will further need to isolate and culture  
773 the microbial communities of the *Russula* root or mycorrhizospheres soil in three  
774 types, which will supplement our research findings. The inoculation of these  
775 microbes can stimulate establishment and will help to enhance plant growth and  
776 promote a change in infected frequency.

777

778 **Conclusion.** The amount of *Russula* DNA is positively correlated with fruiting  
779 body and *Russula* mycorrhizae based on the metagenomics of *Russula* root and soil.  
780 Fewer fungi species were detected in *Russula*- infected and *Russula* sporocarp root.  
781 Fewer bacteria and fungi species were detected in *Russula*- infected and in *Russula*  
782 sporocarp rhizosphere soil. *Boletus* is considered as indicator species in  
783 *Russula*-Fagaceae root (*Quercus glauca* and *Castanopsis hainanensis*) for  
784 sporocarp-producing *Russula*. The *Russula* sporocarp rhizosphere fungi  
785 *Dacryobolu* and *Russula* sporocarp rhizosphere bacteria *Acidocella* is considered as  
786 indicator species for sporocarp-producing *Russula*. On the other hand, a number of  
787 taxa within *Acremonium* and *Cladophialophora* were identified in Fagaceae root in  
788 *Russula* symbiosis. The *Russula* mycorrhizal rhizosphere fungi *Tomentella*, and  
789 *Elaphomyces* and the *Russula* mycorrhizal rhizosphere bacteria *Acidocella*,  
790 *Bryobacter*, *Sorangium* and *Acidobacterium* occurred more frequently in  
791 association with the ECM genus *Russula*. Understanding the ectomycorrhizal  
792 fungal communities inhabiting natural *Russula* growth areas may give us clues  
793 about the dynamics of the targeted *Russula* and the possibility of identifying  
794 mycorrhizal fungal species that are good indicators of successful *Russula*  
795 semicultivation. This reseach may provide novel targeted strategies to improve the  
796 establishment of *Russula*-Fagaceae sp. symbiosis and improve *Russula* ascospore  
797 productivity and sustainability.

## 798 **MATERIALS AND METHODS**

799 **Sampling** . Our study was conducted in areas of *Russula* growth in Jianou, Fujian  
800 province, China, in which species of the genus *Russula* are well represented. The  
801 dominant trees of the areas are *Quercus glauca* and *Castanopsis hainanensis*. The  
802 herb layer is composed of *Podophyllum peltatum*, *Panax stipuleanatus* and  
803 *Saxifraga stolonifera*. Fine roots were excavated 2-3 m from the trunk of an adult  
804 *Russula* symbiotic tree(Fig. S1A). In addition, another type of fine roots that was  
805 clearly connected to *Russula* sporocarp by extraradical mycelia was collected(Fig.  
806 S1B,C). We collected three 15-30 cm fine-root segments (containing 100-200 root  
807 tips) at a depth of 20 cm (77) . Roots from a single tree were pooled into a single

808 plastic bag. More than 200 cm<sup>3</sup> of rhizosphere soil was collected around the root  
809 samples for analyses. All root and soil samples were stored in a cooler containing  
810 several ice bags and transported to our laboratory within 24 h for subsequent  
811 analysis.

812 **DNA extraction, amplification, and sequencing.** The collected root samples were  
813 washed carefully with tap water. Root tips were preserved in a plastic centrifuge  
814 tube at -20°C before DNA extraction. DNA samples were pulverized using liquid  
815 nitrogen. Total genomic DNA was extracted from ECM root tips using a modified  
816 cetyltrimethylammonium bromide method, which was modified according to Wang  
817 et al. (63)(2017). Total genomic DNA of corresponding rhizosphere soil was  
818 extracted using a Fast DNA SPIN Kit (MP Bio) for soil according to the kit  
819 operation steps.

820 First, the entire range of fungal ITS sequences was amplified from roots using the  
821 ECM Basidiomycetes-specific high-coverage primer polymerase chain reaction  
822 (PCR) with the primer pair ITS-1F (CTTGGTCATTTAGACGAAGTAA) and  
823 ITS-4B (CAGGAGACTTGTACACGGTCCAG) (M. Gardes, 1993), and  
824 traditional Sanger sequencing was performed. The sequences were BLAST against  
825 the UNITE database/NCBI database (<http://www.ncbi.nlm.nih.gov>), and taxonomy  
826 was assigned to species or genera using sequence similarity criteria of ≥97% for  
827 species and 90–97% for genera. Furthermore, DNA of root tips identified as  
828 *Russula* and the corresponding *Russula* symbiosis rhizosphere soil were subjected  
829 to Illumina MiSeq high-throughput sequencing of ITS sequences to investigate their  
830 associated microbiomes, while DNA of root tips with no mycorrhiza was used as a  
831 control. The MiSeq sequences were edited, manually corrected in BioEdit 7.0.8 and  
832 clustered into species-level operational taxonomic units (OTUs) at 97% sequence  
833 similarity for species delimitation using PlutoF (<http://unite.ut.ee>) in UNITE(80). If  
834 no match was found in the PlutoF system, any resulting OTU assignments were  
835 individually checked by BLAST against the UNITE database/NCBI database  
836 (<http://www.ncbi.nlm.nih.gov>).

837 To identify the fungi composition, we analyzed 18S ITS1-ITS4 DNA sequences of

838 ECM rhizosphere root and soil samples using phylogenetic methods, operational  
839 taxonomic unit (OTU) delimitations and ordinations to compare species  
840 composition in various types of ECM *Russula*. To identify the bacterial  
841 composition, we analyzed 16S V3-V4 DNA sequences of ECM rhizosphere soil  
842 samples using phylogenetic methods, operational taxonomic unit (OTU)  
843 delimitations and ordinations to compare species composition in various types of  
844 ECM *Russula*.

845 **Statistical analyses.** Chao1 (species richness index) and Shannon (microbial  
846 diversity index) indices were analyzed by 97% OTU similarity. ECM fungal  
847 richness and the microbial diversity index of each *Russula* root tip and the  
848 corresponding rhizosphere soil of *Russula* symbiosis were calculated using the  
849 vegan package and compared by one-way ANOVA. PCoA analyses were based on  
850 any distance other than the Euclidean distance using abundance and  
851 presence-absence data of the top 20 genera in three types. Differences in  
852 community composition among *Russula*-infected samples were visualized by PCoA  
853 (79).

854 **Micro-Community diversity analysis and indicator species analysis.** Taxonomic  
855 analyses were generated based on the community species abundance (each was  
856 above 0.05% of all reads) using Microsoft Excel. The main fungal genus patterns  
857 were determined by taxonomic analysis at different ECM *Russula* mycorrhizal  
858 roots. The main fungal and bacterial genus patterns were also observed in the  
859 *Russula* mycorrhizal rhizosphere. To assess *Russula* preference, aspects indicator  
860 species analysis was carried out by comparing the top 20 genera of three types of  
861 root micro-communities. Indicator species of the community of the top 20 genera  
862 based on the species presence in the *Russula* sample and absence in the no-*Russula*  
863 sample were analyzed by Venny drawing tools  
864 (<https://bioinfogp.cnb.csic.es/tools/venny/index.html>).

865 **Network analyses.** The relationships of *Russula* and other fungi in the *Russula*  
866 community were analyzed by Spearman correlation of the absolute top 20 most  
867 abundant in all the samples using the igraph, psych software package. Network nets

868 constructed on the interrelationship result with  $P > 0.05$  or  $|R| < 0.4$  were filtered. The  
869 relationships of bacteria in the *Russula* mycorrhizal rhizosphere were also analyzed  
870 by Spearman's correlation.

#### 871 **SUPPLEMENTAL MATERIAL**

872 Supplemental material for this article may be found at

873 **SUPPLEMENTAL FILE 1**, TIFF file, 0.48 MB.

874 **SUPPLEMENTAL FILE 1**, PDF file, 0.22 MB.

875 **SUPPLEMENTAL FILE 1**, PDF file, 0.22 MB.

876 **SUPPLEMENTAL FILE 1**, PDF file, 0.22 MB.

877 **SUPPLEMENTAL FILE 1**, PDF file, 0.17 MB.

878 **SUPPLEMENTAL FILE 1**, PDF file, 0.13 MB.

#### 879 **ACKNOWLEDGMENTS**

880 This work was supported by Guiding Program for Science and Technology  
881 Department of Fujian Province (2017N0005) .

#### 882 **REFERENCES**

883

884

- 885 1. Kirk PM CP, Minter DW, Stalpers JA . 2008. Dictionary of the fungi. CAB  
886 International, Wallingford.
- 887 2. Geml J, Laursen GA, Herriott IC, McFarland JM, Booth MG, Lennon N,  
888 Chad Nusbaum H, Lee Taylor D. 2010. Phylogenetic and ecological  
889 analyses of soil and sporocarp DNA sequences reveal high diversity and  
890 strong habitat partitioning in the boreal ectomycorrhizal genus *Russula*  
891 (*Russulales*; *Basidiomycota*). *New Phytol* 187:494-507.
- 892 3. Li M, Liang J, Li Y, Feng B, Yang ZL, James TY, Xu J. 2010. Genetic  
893 diversity of Dahongjun, the commercially important "Big Red Mushroom"  
894 from southern China. *PLoS One* 5:e10684.
- 895 4. J.Z Ying, X.L.MAO , Q.M. MA, Y.C. ZONG & H.A. WEN. 1987. *Icones of*  
896 *medicinal fungi from China*. Science Press, Beijing.
- 897 5. Tedersoo L, Jairus T, Horton BM, Abarenkov K, Suvi T, Saar I, Koljalg U.



- 898 2008. Strong host preference of ectomycorrhizal fungi in a Tasmanian wet  
899 sclerophyll forest as revealed by DNA barcoding and taxon-specific primers.  
900 *New Phytol* 180:479-90.
- 901 6. van der Linde S, Suz LM, Orme CDL, Cox F, Andreae H, Asi E, Atkinson B,  
902 Benham S, Carroll C, Cools N, De Vos B, Dietrich HP, Eichhorn J,  
903 Gehrman J, Grebenc T, Gweon HS, Hansen K, Jacob F, Kristöfel F, Lech P,  
904 Manninger M, Martin J, Meesenburg H, Merilä P, Nicolas M, Pavlenda P,  
905 Rautio P, Schaub M, Schröck HW, Seidling W, Šrámek V, Thimonier A,  
906 Thomsen IM, Titeux H, Vanguelova E, Verstraeten A, Vesterdal L, Waldner  
907 P, Wijk S, Zhang Y, Žlindra D, Bidartondo MI. 2018. Environment and host  
908 as large-scale controls of ectomycorrhizal fungi. *Nature* 558:243-248.
- 909 7. Deacon JW, Donaldson SJ, Last FT. 1983. Sequences and interactions of  
910 mycorrhizal fungi on birch. *Plant & Soil* 71:257-262.
- 911 8. Toju H, Yamamoto S, Sato H, Tanabe AS. 2013. Sharing of diverse  
912 mycorrhizal and root-endophytic fungi among plant species in an  
913 oak-dominated cool-temperate forest. *PLoS One* 8:e78248.
- 914 9. Miyamoto Y, Nara K. 2016. Soil propagule banks of ectomycorrhizal fungi  
915 share many common species along an elevation gradient. *Mycorrhiza*  
916 26:189-97.
- 917 10. Sugiyama Y, Murata M, Kanetani S, Nara K. 2019. Towards the  
918 conservation of ectomycorrhizal fungi on endangered trees: native fungal  
919 species on *Pinus amamiana* are rarely conserved in trees planted ex situ.  
920 *Mycorrhiza* 29:195-205.
- 921 11. Toju H, Yamamoto S, Sato H, Tanabe AS, Gilbert GS, Kadowaki K. 2013.  
922 Community composition of root-associated fungi in a *Quercus*-dominated  
923 temperate forest: "codominance" of mycorrhizal and root-endophytic fungi.  
924 *Ecol Evol* 3:1281-93.
- 925 12. Taniguchi T, Kanzaki N, Tamai S, Yamanaka N, Futai K. 2007. Does  
926 ectomycorrhizal fungal community structure vary along a Japanese black  
927 pine (*Pinus thunbergii*) to black locust (*Robinia pseudoacacia*) gradient?

- 928 New Phytol 173:322-34.
- 929 13. Wang XH, Yang ZL, Li YC, Knudsen H, Liu PG. 2009. *Russula*  
930 *griseocarnosa* sp nov (Russulaceae, Russulales), a commercially important  
931 edible mushroom in tropical China: mycorrhiza, phylogenetic position, and  
932 taxonomy. *Nova Hedwigia* 88:269-282.
- 933 14. Albornoz FE, Teste FP, Lambers H, Bunce M, Murray DC, White NE,  
934 Laliberte E. 2016. Changes in ectomycorrhizal fungal community  
935 composition and declining diversity along a 2-million-year soil  
936 chronosequence. *Mol Ecol* 25:4919-29.
- 937 15. Horton TR, Bruns TD. 2001. The molecular revolution in ectomycorrhizal  
938 ecology: peeking into the black-box. *Mol Ecol* 10:1855-71.
- 939 16. Taylor DL, Bruns TD. 1999. Community structure of ectomycorrhizal fungi  
940 in a *Pinus muricata* forest: minimal overlap between the mature forest and  
941 resistant propagule communities. *Mol Ecol* 8:1837-50.
- 942 17. Gebhardt S, Neubert K, Wollecke J, Munzenberger B, Huttel RF. 2007.  
943 Ectomycorrhiza communities of red oak (*Quercus rubra* L.) of different age  
944 in the Lusatian lignite mining district, East Germany. *Mycorrhiza*  
945 17:279-290.
- 946 18. Yamamoto S, Sato H, Tanabe AS, Hidaka A, Kadowaki K, Toju H. 2014.  
947 Spatial segregation and aggregation of ectomycorrhizal and root-endophytic  
948 fungi in the seedlings of two *Quercus* species. *PLoS One* 9:e96363.
- 949 19. Mandyam K, and A. Jumpponen. 2005. Seeking the elusive function of the  
950 root-colonising dark septate endophytic fungi. *Studies in Mycology*  
951 53:173-189.
- 952 20. Huang J, Nara K, Zong K, Lian C. 2015. Soil propagule banks of  
953 ectomycorrhizal fungi along forest development stages after mining. *Microb*  
954 *Ecol* 69:768-77.
- 955 21. Peay KG, Schubert MG, Nguyen NH, Bruns TD. 2012. Measuring  
956 ectomycorrhizal fungal dispersal: macroecological patterns driven by  
957 microscopic propagules. *Mol Ecol* 21:4122-36.

- 958 22. Liang Y, Guo LD, Ma KP. 2004. Genetic structure of a population of the  
959 ectomycorrhizal fungus *Russula vinosa* in subtropical woodlands in  
960 southwest China. *Mycorrhiza* 14:235-40.
- 961 23. Smith SE, and Read, D. J. 2008. *Mycorrhizal Symbiosis*. London: Academic  
962 3rd Edn.
- 963 24. Genney DR, Anderson IC, Alexander IJ. 2006. Fine-scale distribution of  
964 pine ectomycorrhizas and their extramatrical mycelium. *New Phytol*  
965 170:381-90.
- 966 25. Koide RT, Xu B, Sharda J, Lekberg Y, Ostiguy N. 2005. Evidence of species  
967 interactions within an ectomycorrhizal fungal community. *New Phytol*  
968 165:305-16.
- 969 26. Hortal S, Pera J, Parladé J. 2008. Tracking mycorrhizas and extraradical  
970 mycelium of the edible fungus *Lactarius deliciosus* under field competition  
971 with *Rhizopogon* spp. *Mycorrhiza* 18:69-77.
- 972 27. Olsson PA MB, Mahmood S, Erland S. 2000. Molecular and anatomical  
973 evidence for a three-way association between *Pinus sylvestris* and the  
974 ectomycorrhizal fungi *Suillus bovinus* and *Gomphidius roseus*. *Mycological*  
975 *Research* 104:1372-1378.
- 976 28. Bessette AE BA, Fischer DW. 1997. *Mushrooms of northeastern North*  
977 *America*. Syracuse. NY, USA: Syracuse University Press.
- 978 29. Hodge A. 2000. Microbial ecology of the arbuscular mycorrhiza. *FEMS*  
979 *Microbiol Ecol* 32:91-96.
- 980 30. Warmink JA, van Elsas JD. 2008. Selection of bacterial populations in the  
981 mycosphere of *Laccaria proxima*: is type III secretion involved? *ISME J*  
982 2:887-900.
- 983 31. Izumi H, Finlay RD. 2011. Ectomycorrhizal roots select distinctive bacterial  
984 and ascomycete communities in Swedish subarctic forests. *Environ*  
985 *Microbiol* 13:819-30.
- 986 32. De Miguel AM, Agueda B, Sanchez S, Parlade J. 2014. Ectomycorrhizal  
987 fungus diversity and community structure with natural and cultivated truffle

- 988 hosts: applying lessons learned to future truffle culture. *Mycorrhiza* 24  
989 Suppl 1:S5-18.
- 990 33. Burke DJ, Dunham SM, Kretzer AM. 2008. Molecular analysis of bacterial  
991 communities associated with the roots of Douglas fir (*Pseudotsuga*  
992 *menziesii*) colonized by different ectomycorrhizal fungi. *FEMS Microbiol*  
993 *Ecol* 65:299-309.
- 994 34. Kataoka R, Futai K. 2008. A new mycorrhizal helper  
995 bacterium, *Ralstonia* species, in the ectomycorrhizal symbiosis between *Pinus*  
996 *thunbergii* and *Suillus granulatus*. *Biology & Fertility of Soils* 45:315-320.
- 997 35. Pent M, Hiltunen M, Poldmaa K, Furneaux B, Hildebrand F, Johannesson H,  
998 Ryberg M, Bahram M. 2018. Host genetic variation strongly influences the  
999 microbiome structure and function in fungal fruiting-bodies. *Environ*  
1000 *Microbiol* 20:1641-1650.
- 1001 36. Boersma FG, Warmink JA, Andreote FA, van Elsas JD. 2009. Selection of  
1002 Sphingomonadaceae at the base of *Laccaria proxima* and *Russula exalbicans*  
1003 fruiting bodies. *Appl Environ Microbiol* 75:1979-89.
- 1004 37. Boer W, Folman LB, Summerbell RC, Boddy L. 2005. Living in a fungal  
1005 world: impact of fungi on soil bacterial niche development. *FEMS*  
1006 *Microbiol Rev* 29:795-811.
- 1007 38. Johansson JF, Paul LR, Finlay RD. 2004. Microbial interactions in the  
1008 mycorrhizosphere and their significance for sustainable agriculture. *FEMS*  
1009 *Microbiol Ecol* 48:1-13.
- 1010 39. Andersson BE, Lundstedt S, Tornberg K, Schnurer Y, Oberg LG, Mattiasson  
1011 B. 2003. Incomplete degradation of polycyclic aromatic hydrocarbons in  
1012 soil inoculated with wood-rotting fungi and their effect on the indigenous  
1013 soil bacteria. *Environ Toxicol Chem* 22:1238-43.
- 1014 40. Warmink JA, Nazir R, van Elsas JD. 2009. Universal and species-specific  
1015 bacterial 'fungiphiles' in the mycospheres of different basidiomycetous fungi.  
1016 *Environ Microbiol* 11:300-12.
- 1017 41. Uroz S, Calvaruso C, Turpault MP, Pierrat JC, Mustin C, Frey-Klett P. 2007.

- 1018 Effect of the mycorrhizosphere on the genotypic and metabolic diversity of  
1019 the bacterial communities involved in mineral weathering in a forest soil.  
1020 *Appl Environ Microbiol* 73:3019-27.
- 1021 42. Riedlinger J, Schrey SD, Tarkka MT, Hampp R, Kapur M, Fiedler HP. 2006.  
1022 Auxofuran, a novel metabolite that stimulates the growth of fly agaric, is  
1023 produced by the mycorrhiza helper bacterium *Streptomyces* strain AcH 505.  
1024 *Appl Environ Microbiol* 72:3550-7.
- 1025 43. Frey-Klett P, Garbaye J, Tarkka M. 2007. The mycorrhiza helper bacteria  
1026 revisited. *New Phytol* 176:22-36.
- 1027 44. Bending GD, Poole EJ, Whipps JM, Read DJ. 2002. Characterisation of  
1028 bacteria from *Pinus sylvestris*-*Suillus luteus* mycorrhizas and their effects  
1029 on root-fungus interactions and plant growth. *FEMS Microbiol Ecol*  
1030 39:219-27.
- 1031 45. Kataoka R, Taniguchi T, Futai K. 2009. Fungal selectivity of two  
1032 mycorrhiza helper bacteria on five mycorrhizal fungi associated with *Pinus*  
1033 *thunbergii*. *World Journal of Microbiology & Biotechnology* 25:1815-1819.
- 1034 46. Hållberg MN, Hållberg P. 2002. Extramatrical ectomycorrhizal  
1035 mycelium contributes one-third of microbial biomass and produces, together  
1036 with associated roots, half the dissolved organic carbon in a forest soil. *New*  
1037 *Phytologist* 154:791-795.
- 1038 47. Björn L, Jan S, Roger F. 2001. Effects of resource availability on mycelial  
1039 interactions and <sup>32</sup>P transfer between a saprotrophic and an ectomycorrhizal  
1040 fungus in soil microcosms. *Fems Microbiology Ecology*:1.
- 1041 48. Tedersoo L, Partel K, Jairus T, Gates G, Poldmaa K, Tamm H. 2009.  
1042 Ascomycetes associated with ectomycorrhizas: molecular diversity and  
1043 ecology with particular reference to the Helotiales. *Environ Microbiol*  
1044 11:3166-78.
- 1045 49. Zampieri E, Murat C, Cagnasso M, Bonfante P, Mello A. 2010. Soil analysis  
1046 reveals the presence of an extended mycelial network in a *Tuber magnatum*  
1047 truffle-ground. *FEMS Microbiol Ecol* 71:43-9.

- 1048 50. Zhou Z, Miwa M, Matsuda Y, Hogetsu T. 2001. Spatial Distribution of the  
1049 Subterranean Mycelia and Ectomycorrhizae of *Suillus grevillei* Genets.  
1050 Journal of Plant Research 114:179-185.
- 1051 51. Parlade J, De la Varga H, De Miguel AM, Saez R, Pera J. 2013.  
1052 Quantification of extraradical mycelium of *Tuber melanosporum* in soils  
1053 from truffle orchards in northern Spain. Mycorrhiza 23:99-106.
- 1054 52. De la Varga H, Agueda B, Martinez-Pena F, Parlade J, Pera J. 2012.  
1055 Quantification of extraradical soil mycelium and ectomycorrhizas of  
1056 *Boletus edulis* in a Scots pine forest with variable sporocarp productivity.  
1057 Mycorrhiza 22:59-68.
- 1058 53. Guidot A, Debaud JC, Marmeisse R. 2001. Correspondence between genet  
1059 diversity and spatial distribution of above- and below-ground populations of  
1060 the ectomycorrhizal fungus *Hebeloma cylindrosporum*. Mol Ecol  
1061 10:1121-31.
- 1062 54. Bonfante P, Anca IA. 2009. Plants, mycorrhizal fungi, and bacteria: a  
1063 network of interactions. Annu Rev Microbiol 63:363-83.
- 1064 55. Li Q, Yan L, Ye L, Zhou J, Zhang B, Peng W, Zhang X, Li X. 2018. Chinese  
1065 Black Truffle (*Tuber indicum*) Alters the Ectomycorrhizosphere and  
1066 Endoectomycosphere Microbiome and Metabolic Profiles of the Host Tree  
1067 *Quercus aliena*. Front Microbiol 9:2202.
- 1068 56. Li X, Zhang X, Yang M, Yan L, Kang Z, Xiao Y, Tang P, Ye L, Zhang B,  
1069 Zou J, Liu C. 2019. *Tuber borchii* Shapes the Ectomycorrhizosphere  
1070 Microbial Communities of *Corylus avellana*. Mycobiology 47:180-190.
- 1071 57. Mello A, Napoli C, Murat C, Morin E, Marceddu G, Bonfante P. 2011.  
1072 ITS-1 versus ITS-2 pyrosequencing: a comparison of fungal populations in  
1073 truffle grounds. Mycologia 103:1184-93.
- 1074 58. Blaalid R, Davey ML, Kauserud H, Carlsen T, Halvorsen R, Hoiland K,  
1075 Eidesen PB. 2014. Arctic root-associated fungal community composition  
1076 reflects environmental filtering. Mol Ecol 23:649-59.
- 1077 59. Jumpponen A, Jones KL, David Mattox J, Yaege C. 2010. Massively

- 1078 parallel 454-sequencing of fungal communities in *Quercus* spp.  
1079 ectomycorrhizas indicates seasonal dynamics in urban and rural sites. *Mol*  
1080 *Ecol* 19 Suppl 1:41-53.
- 1081 60. Toju H, Sato H, Tanabe AS. 2014. Diversity and spatial structure of  
1082 belowground plant-fungal symbiosis in a mixed subtropical forest of  
1083 ectomycorrhizal and arbuscular mycorrhizal plants. *PLoS One* 9:e86566.
- 1084 61. Nakamura N, Tanaka E, Tanaka C, Takeuchi-Kaneko Y. 2018. Localization  
1085 of helotialean fungi on ectomycorrhizae of *Castanopsis cuspidata* visualized  
1086 by in situ hybridization. *Mycorrhiza* 28:17-28.
- 1087 62. Sato H, Morimoto S, Hattori T. 2012. A thirty-year survey reveals that  
1088 ecosystem function of fungi predicts phenology of mushroom fruiting. *PLoS*  
1089 *One* 7:e49777.
- 1090 63. Wang X, Liu J, Long D, Han Q, Huang J. 2017. The ectomycorrhizal fungal  
1091 communities associated with *Quercus liaotungensis* in different habitats  
1092 across northern China. *Mycorrhiza* 27:441-449.
- 1093 64. Benucci GM, Bonito G, Baciarelli Falini L, Bencivenga M. 2012.  
1094 Mycorrhization of pecan trees (*Carya illinoensis*) with commercial truffle  
1095 species: *Tuber aestivum* Vittad. and *Tuber borchii* Vittad. *Mycorrhiza*  
1096 22:383-92.
- 1097 65. Vivas A, Barea JM, Azcón R. 2005. Interactive effect of *Brevibacillus brevis*  
1098 and *Glomus mosseae*, both isolated from Cd contaminated soil, on plant  
1099 growth, physiological mycorrhizal fungal characteristics and soil enzymatic  
1100 activities in Cd polluted soil. *Environ Pollut* 134:257-66.
- 1101 66. Rangel-Castro JI, Levenfors JJ, Danell E. 2002. Physiological and genetic  
1102 characterization of fluorescent *Pseudomonas* associated with *Cantharellus*  
1103 *cibarius*. *Can J Microbiol* 48:739-48.
- 1104 67. Timonen S, Hurek T. 2006. Characterization of culturable bacterial  
1105 populations associating with *Pinus sylvestris*--*Suillus bovinus*  
1106 mycorrhizospheres. *Can J Microbiol* 52:769-78.
- 1107 68. Marupakula S, Mahmood S, Finlay RD. 2016. Analysis of single root tip

- 1108 microbiomes suggests that distinctive bacterial communities are selected by  
1109 *Pinus sylvestris* roots colonized by different ectomycorrhizal fungi. *Environ*  
1110 *Microbiol* 18:1470-83.
- 1111 69. Frey P, Frey-Klett P, Garbaye J, Berge O, Heulin T. 1997. Metabolic and  
1112 Genotypic Fingerprinting of Fluorescent Pseudomonads Associated with the  
1113 Douglas Fir-*Laccaria bicolor* Mycorrhizosphere. *Appl Environ Microbiol*  
1114 63:1852-60.
- 1115 70. Nazir R, Tazetdinova DI, van Elsas JD. 2014. *Burkholderia terrae* BS001  
1116 migrates proficiently with diverse fungal hosts through soil and provides  
1117 protection from antifungal agents. *Front Microbiol* 5:598.
- 1118 71. Labbé JL, Weston DJ, Dunkirk N, Pelletier DA, Tuskan GA. 2014. Newly  
1119 identified helper bacteria stimulate ectomycorrhizal formation in *Populus*.  
1120 *Front Plant Sci* 5:579.
- 1121 72. Navarro-Ródenas A, Berna LM, Lozano-Carrillo C, Andrino A, Morte A.  
1122 2016. Beneficial native bacteria improve survival and mycorrhization of  
1123 desert truffle mycorrhizal plants in nursery conditions. *Mycorrhiza*  
1124 26:769-79.
- 1125 73. Mello A, Ding GC, Piceno YM, Napoli C, Tom LM, DeSantis TZ, Andersen  
1126 GL, Smalla K, Bonfante P. 2013. Truffle brules have an impact on the  
1127 diversity of soil bacterial communities. *PLoS One* 8:e61945.
- 1128 74. Barriuso J, Pereyra MT, Lucas Garcia JA, Megias M, Gutierrez Manero FJ,  
1129 Ramos B. 2005. Screening for putative PGPR to improve establishment of  
1130 the symbiosis *Lactarius deliciosus*-*Pinus* sp. *Microb Ecol* 50:82-9.
- 1131 75. Ingleby K, Munro RC, Noor M, Mason PA, Clearwater MJ. 1998.  
1132 Ectomycorrhizal populations and growth of *Shorea parvifolia*  
1133 (Dipterocarpaceae) seedlings regenerating under three different forest  
1134 canopies following logging. *Forest Ecology & Management* 111:0-179.
- 1135 76. Southworth D, Carrington EM, Frank JL, Gould P, Harrington CA, Devine  
1136 WD. 2009. Mycorrhizas on nursery and field seedlings of *Quercus garryana*.  
1137 *Mycorrhiza* 19:149-158.



- 1138 77. Kubisch P, Hertel D, Leuschner C. 2015. Do ectomycorrhizal and arbuscular  
1139 mycorrhizal temperate tree species systematically differ in root order-related  
1140 fine root morphology and biomass? *Front Plant Sci* 6:64.
- 1141 78. Tedersoo L, Nilsson RH, Abarenkov K, Jairus T, Sadam A, Saar I, Bahram  
1142 M, Bechem E, Chuyong G, Koljalg U. 2010. 454 Pyrosequencing and  
1143 Sanger sequencing of tropical mycorrhizal fungi provide similar results but  
1144 reveal substantial methodological biases. *New Phytol* 188:291-301.
- 1145 79. Wang Y, Sheng HF, He Y, Wu JY, Jiang YX, Tam NF, Zhou HW. 2012.  
1146 Comparison of the levels of bacterial diversity in freshwater, intertidal  
1147 wetland, and marine sediments by using millions of illumina tags. *Appl*  
1148 *Environ Microbiol* 78:8264-71.
- 1149
- 1150

| Type                                         | Relative<br>Russula<br>OUT<br>abundance<br>(%) in<br>ECM<br>Russula<br>root | Chao1<br>richness of<br>Fungi<br>Community of<br>ECM<br>Russula<br>root | Shannon<br>of<br>Fungi<br>Community of<br>ECM<br>Russula<br>root | Relative<br>Russula<br>OUT<br>abundance<br>(%)<br>in ECM<br>Russula<br>rhizosphere | Chao1<br>richness<br>of Fungi<br>Community of<br>ECM<br>Russula<br>rhizosphere | Shannon<br>of<br>Fungi<br>Community of<br>ECM<br>Russula<br>rhizosphere | Chao1<br>richness<br>of<br>Bacterial<br>Community of<br>ECM<br>Russula<br>rhizosphere | Shannon<br>of<br>Bacterial<br>Community of<br>ECM<br>Russula<br>rhizosphere |
|----------------------------------------------|-----------------------------------------------------------------------------|-------------------------------------------------------------------------|------------------------------------------------------------------|------------------------------------------------------------------------------------|--------------------------------------------------------------------------------|-------------------------------------------------------------------------|---------------------------------------------------------------------------------------|-----------------------------------------------------------------------------|
| Russula –<br>infected<br>(type1)             | 28.74<br>±<br><br>19.31B <sub>1,2</sub>                                     | 663.12 ±<br><br>171.655b                                                | 4.04 ±<br><br>1.007b                                             | 20.22<br>±<br><br>4.59B                                                            | 901.38<br>±<br><br>32.30a                                                      | 4.52 ±<br>0.53a                                                         | 1010.28<br>±<br><br>17.29b                                                            | 7.54 ±<br>0.10b                                                             |
| Russula<br>sporocarp<br>producing<br>(type2) | 66.66<br>±<br><br>12.92C                                                    | 170.44 ±<br>24.68c                                                      | 2.20 ±<br>0.19 c                                                 | 39.23<br>±<br><br>7.58C                                                            | 756.87<br>±<br><br>52.18b                                                      | 4.56 ±<br>0.99a                                                         | 945.81<br>±<br><br>25.08b                                                             | 7.49 ±<br>0.049b                                                            |
| Russula-no-in<br>fected<br>(type3)           | 1.44 ±<br>1.02A                                                             | 782.20 ±<br><br>102.345a                                                | 4.55 ±<br>0.921a                                                 | 5.61 ±<br>1.71A                                                                    | 874.19<br>±<br><br>41.16a                                                      | 4.47 ±<br>0.95a                                                         | 1099.52<br>±<br><br>13.14a                                                            | 7.94 ±<br>0.13a                                                             |

| Common species in three types                                                                                                                                                                                         | Common species in type1 and type2, Excluding those that are common to all three types | species included exclusively in Type 2, comparing to collecting Type 1,3; and belong to Common in type2 |
|-----------------------------------------------------------------------------------------------------------------------------------------------------------------------------------------------------------------------|---------------------------------------------------------------------------------------|---------------------------------------------------------------------------------------------------------|
| <b>Fungi of ECM Russula root</b><br><i>Tomentella, Lactarius, Russula</i>                                                                                                                                             | <i>Acremonium, Cladophialophora</i>                                                   | <i>Boletus</i>                                                                                          |
| <b>Fungi of Russula Mycorrhizal rhizosphere</b><br><i>Russula, Mortierella, Penicillium, Trichoderma</i>                                                                                                              | <i>Elaphomyces, Tomentella,</i>                                                       | <i>Dacryobolus</i>                                                                                      |
| <b>Bacterial of Russula Mycorrhizal rhizosphere</b><br><i>Acidibacter, Candidatus_Solibacter, Variibacter, Burkholderia-Paraburkholderia, Roseiarcus, Bradyrhizobium, Granulicella, Acidothermus, Rhizomicrobium,</i> | <i>Bryobacter, Sorangium, Acidicaldus, Acidobacterium</i>                             | <i>Acidocella</i>                                                                                       |

|                                               | TYPE2             |           | TYPE1      |             |            |              | TYPE3     |             |              |
|-----------------------------------------------|-------------------|-----------|------------|-------------|------------|--------------|-----------|-------------|--------------|
| sample name                                   | MFS1 <sup>A</sup> | MFS2      | MFE1       | MFE2        | MFE3       | MFE4         | MFK1      | MFK2        | MFK3         |
| <b>Total number of genus in Interspection</b> | 15                |           | 6          |             |            |              | 4         |             |              |
| <b>Total number of genus in Collection</b>    | 24                |           | 46         |             |            |              | 41        |             |              |
| 1                                             | g_Russula         | g_Russula | g_Russula  | g_unidentif | g_unidenti | g_Russula    | g_Tomente | g_unidentif | g_unidentifi |
| 2                                             | g_Tomente         | g_Tomente | g_Microidi | g_Russula   | g_Russula  | g_unidentifi | g_unident | g_Tomentell | g_Trechispor |
| 3                                             | g_Boletus         | g_unident | g_Cladophi | g_Elaphom   | g_Sebacina | g_Elaphomyce | g_Sporide | g_Lactarius | g_Tomentella |
| 4                                             | g_unident         | g_Lactari | g_unidenti | g_Hydnum    | g_Hemilecc | g_Pseudoprob | g_Lactari | g_Russula   | g_Pseudoprob |
| 5                                             | g_Lactari         | g_Boletus | g_Cytospor | g_Clitocy   | g_Elaphomy | g_Tomentella | g_Russula | g_Rhizoderm | g_Xylogone   |

|    |                        |                        |                         |                        |                        |                        |                        |                         |                    |
|----|------------------------|------------------------|-------------------------|------------------------|------------------------|------------------------|------------------------|-------------------------|--------------------|
|    | us                     |                        | a                       | bula                   | ces                    |                        |                        | ea                      |                    |
| 6  | g_Hymenos<br>cyphus    | g_Hymenos<br>cyphus    | g_Cortinar<br>ius       | g_Tomente<br>lla       | g_Trechisp<br>ora      | g_Cladophial<br>ophora | g_Talarom<br>yces      | g_Phialea               | g_Sebacina         |
| 7  | g_Clitocy<br>bula      | g_Cortina<br>rius      | g_Archaeor<br>hizomyces | g_Lauriom<br>yces      | g_Psathyre<br>lla      | g_Lactarius            | g_Sebacin<br>a         | g_Trichoder<br>ma       | g_Lactarius        |
| 8  | g_Xylogon<br>e         | g_Acremon<br>ium       | g_Phellinu<br>s         | g_Cladoph<br>ialophora | g_Lactariu<br>s        | g_Mortierell<br>a      | g_Cladoph<br>ialophora | g_Cladophia<br>lophora  | g_Talaromyce<br>s  |
| 9  | g_Acremon<br>ium       | g_Phellod<br>on        | g_Mortiere<br>lla       | g_Myriost<br>oma       | g_Tomentel<br>la       | g_Fusarium             | g_Penicil<br>lium      | g_Thozetell<br>a        | g_Calvatia         |
| 10 | g_Cladoph<br>ialophora | g_Xylogon<br>e         | g_Penicill<br>ium       | g_Phellod<br>on        | g_Lasiosph<br>aeria    | g_Acremonium           | g_Deconic<br>a         | g_Rhodovero<br>naea     | g_Cephalothe<br>ca |
| 11 | g_Cortina<br>rius      | g_Cladoph<br>ialophora | g_Acremoni<br>um        | g_Xylogon<br>e         | g_Xylogone             | g_Rasamsonia           | g_Coprine<br>llus      | g_Chaetosph<br>aeria    | g_Lysurus          |
| 12 | g_Elaphom<br>yces      | g_Clitocy<br>bula      | g_Lactariu<br>s         | g_Rhodove<br>ronaea    | g_Mortiere<br>lla      | g_Sordaria             | g_Trichod<br>erma      | g_Glioceph<br>lotrichum | g_Hemileccin<br>um |
| 13 | g_Phellod<br>on        | g_Thozete<br>lla       | g_Rhodover<br>onaea     | g_Acremon<br>ium       | g_Cladophi<br>alophora | g_Sporidesmi<br>um     | g_Inocybe              | g_Chalara               | g_Pezoloma         |
| 14 | g_Thozete<br>lla       | g_Elaphom<br>yces      | g_Fusarium              | g_Cortina<br>rius      | g_Oidiode<br>ndron     | g_Hyaloscyph<br>a      | g_Mortier<br>ella      | g_Mortierel<br>la       | g_Cytospora        |
| 15 | g_Chaetos<br>phaeria   | g_Kazachs<br>tania     | g_Cryptosp<br>oriopsis  | g_Oidiode<br>ndron     | g_Hydnum               | g_Nectria              | g_Cercoph<br>ora       | g_Oidiode<br>ndron      | g_Russula          |
| 16 | g_Penicil<br>lium      | g_Issatch<br>enkia     | g_Rhizoder<br>mea       | g_Lactari<br>us        | g_Operculo<br>myces    | g_Trichoderm<br>a      | g_Xylogon<br>e         | g_Chloridiu<br>m        | g_Oidiode<br>ndron |
| 17 | g_Phialea              | g_Phialea              | g_Dactylel<br>lina      | g_Clavuli<br>na        | g_Trichode<br>rma      | g_Clathrus             | g_Clathru<br>s         | g_Cortinari<br>us       | g_Thozetella       |
| 18 | g_Inocybe              | g_Chaetos              | g_Myrmecri              | g_Rhizode              | g_Acremoni             | g_Antrodiell           | g_Dendroc              | g_Hymenoscy             | g_Genolevuri       |

|           |                       |                      |                   |                      |                   |                       |                    |                     |                    |
|-----------|-----------------------|----------------------|-------------------|----------------------|-------------------|-----------------------|--------------------|---------------------|--------------------|
|           |                       | phaeria              | dium              | rmea                 | um                | a                     | lathra             | phus                | a                  |
| <b>19</b> | g__Colleto<br>trichum | g__Thielav<br>ia     | g__Xylogone       | g__Sebacin<br>a      | g__Clitopil<br>us | g__Colletotri<br>chum | g__Fusariu<br>m    | g__Sporidesm<br>ium | g__Penicilliu<br>m |
| <b>20</b> | g__Myrmecr<br>idium   | g__Rhodove<br>ronaea | g__Tomentel<br>la | g__Opercul<br>omyces | g__Pezoloma       | g__Talaromyce<br>s    | g__Elaphom<br>yces | g__Calonectr<br>ia  | g__Chaetomium      |

|                                               | TYPE2              |                    | TYPE1                |                         |                    |                    | TYPE3                   |                     |                      |
|-----------------------------------------------|--------------------|--------------------|----------------------|-------------------------|--------------------|--------------------|-------------------------|---------------------|----------------------|
| sample name                                   | SFS1               | SFS2               | SFE1                 | SFE2                    | SFE3               | SFE4               | SFK1                    | SFK2                | SFK3                 |
| <b>Total number of genus in Inters ection</b> | 12                 |                    | 7                    |                         |                    |                    | 7                       |                     |                      |
| <b>Total number of genus in Collec tion</b>   | 26                 |                    | 40                   |                         |                    |                    | 36                      |                     |                      |
| 1                                             | g_Russula          | g_Russula          | g_Mortier<br>ella    | g_Elaphomyc<br>es       | g_Russula          | g_Russula          | g_Archaeorh<br>izomyces | g_unidenti<br>fied  | g_unidentif<br>ied   |
| 2                                             | g_Elaphomy<br>ces  | g_Elaphom<br>yces  | g_unident<br>ified   | g_Russula               | g_unident<br>ified | g_Elaphomyc<br>es  | g_Penicilli<br>um       | g_Tomentel<br>la    | g_Mortierel<br>la    |
| 3                                             | g_unidenti<br>fied | g_unident<br>ified | g_Russula            | g_unidentif<br>ied      | g_Trichod<br>erma  | g_Mortierel<br>la  | g_unidentif<br>ied      | g_Rhodover<br>onaea | g_Geminibas<br>idium |
| 4                                             | g_Clitocyb<br>ula  | g_Tomente<br>lla   | g_Geminib<br>asidium | g_Archaeorh<br>izomyces | g_Tomente<br>lla   | g_unidentif<br>ied | g_Russula               | g_Lactariu<br>s     | g_Tomentell<br>a     |
| 5                                             | g_Tomentel         | g_Lactari          | g_Tomente            | g_Clitocybu             | g_Mortier          | g_Pseudopro        | g_Pseudopro             | g_Russula           | g_Russula            |

|    |                     |                    |                    |                    |                    |                |                    |                     |                    |
|----|---------------------|--------------------|--------------------|--------------------|--------------------|----------------|--------------------|---------------------|--------------------|
|    | la                  | us                 | lla                | la                 | ella               | boscispora     | boscispora         |                     |                    |
| 6  | g_Lactarius         | g_Clitocybula      | g_Elaphomyces      | g_Tomentella       | g_Elaphomyces      | g_Trichoderma  | g_Rhodoveroniaea   | g_Archaeorhizomyces | g_Penicillium      |
| 7  | g_Archaeorhizomyces | g_Sporidesmium     | g_Penicillium      | g_Rhodoveroniaea   | g_Lactarius        | g_Tomentella   | g_Myrmecridium     | g_Cortinari         | g_Saitozyma        |
| 8  | g_Mortierella       | g_Lasiosphaeria    | g_Clitocybula      | g_Trechispora      | g_Penicillium      | g_Penicillium  | g_Trechispora      | g_Corticium         | g_Trichoderma      |
| 9  | g_Penicillium       | g_Mortierella      | g_Trichoderma      | g_Acremonium       | g_Saitozyma        | g_Sebacina     | g_Cladophialophora | g_Mortierella       | g_Clavulina        |
| 10 | g_Cladophialophora  | g_Inocybe          | g_Saitozyma        | g_Mortierella      | g_Umbelopsis       | g_Lactarius    | g_Aspergillus      | g_Saitozyma         | g_Pseudoboscispora |
| 11 | g_Cortinari         | g_Saitozyma        | g_Bifiguratus      | g_Microdochium     | g_Sporidesmium     | g_Chloridium   | g_Oidiodendron     | g_Microdochium      | g_Bifiguratus      |
| 12 | g_Saitozyma         | g_Cladophialophora | g_Lactarius        | g_Cookeina         | g_Geminibasidium   | g_Amplistroma  | g_Trichoderma      | g_Sympodiella       | g_Sebacina         |
| 13 | g_Coralloidiomyces  | g_Penicillium      | g_Cladophialophora | g_Cladophialophora | g_Sebacina         | g_Fusarium     | g_Chloridium       | g_Trichoderma       | g_Talaromyces      |
| 14 | g_Rhodoveroniaea    | g_Trichoderma      | g_Chaetomium       | g_Trichoderma      | g_Lasiosphaeria    | g_Microdochium | g_Chaetomium       | g_Penicillium       | g_Clitopilus       |
| 15 | g_Dacryobolus       | g_Thanatephorus    | g_Hypomyces        | g_Pseudoboscispora | g_Inocybe          | g_Antrodia     | g_Mortierella      | g_Chaetomium        | g_Chaetomium       |
| 16 | g_Trichoderma       | g_Microdochium     | g_Umbelopsis       | g_Penicillium      | g_Bionectria       | g_Bifiguratus  | g_Lactarius        | g_Cladophialophora  | g_Umbelopsis       |
| 17 | g_Acremonium        | g_Dacryobolus      | g_Coralloidiomyces | g_Myrmecridium     | g_Cladophialophora | g_Clitopilus   | g_Acremonium       | g_Clitopilus        | g_Sordaria         |
| 18 | g_Botryobasium      | g_Acremonium       | g_Xylogon          | g_Saitozyma        | g_Chloridium       | g_Sordaria     | g_Chaetosphaeria   | g_Oidiodendron      | g_Oidiodendron     |



|           |                     |                   |                      |                  |                       |                  |                   |                     |                        |
|-----------|---------------------|-------------------|----------------------|------------------|-----------------------|------------------|-------------------|---------------------|------------------------|
|           | sidium              | ium               | e                    |                  | ium                   |                  | aeria             | dron                | ron                    |
| <b>19</b> | g_Clitopil<br>us    | g_Chaetom<br>ium  | g_Sebacin<br>a       | g_Hydnum         | g_Chaetom<br>ium      | g_Nectria        | g_Fusarium        | g_Clavulin<br>opsis | g_Cladophia<br>lophora |
| <b>20</b> | g_Arachnop<br>eziza | g_Talarom<br>yces | g_Chaetos<br>phaeria | g_Chaetomiu<br>m | g_Staphyl<br>otrichum | g_Acremoniu<br>m | g_Amplistro<br>ma | g_Xylogone          | g_Xylogone             |

|                                              | TYPE2                   |                         | TYPE1                   |                                 |                                 |                         | TYPE3                   |                         |                 |
|----------------------------------------------|-------------------------|-------------------------|-------------------------|---------------------------------|---------------------------------|-------------------------|-------------------------|-------------------------|-----------------|
| sample name                                  | SBS1                    | SBS2                    | SBE1                    | SBE2                            | SBE3                            | SBE4                    | SBK1                    | SBK2                    | SBK3            |
| <b>Total number of genus in Intersection</b> | 18                      |                         | 14                      |                                 |                                 |                         | 12                      |                         |                 |
| <b>Total number of genus in Collection</b>   | 20                      |                         | 27                      |                                 |                                 |                         | 26                      |                         |                 |
| 1                                            | g_unidentified          | g_unidentified          | g_unidentified          | g_unidentified                  | g_unidentified                  | g_unidentified          | g_unidentified          | g_unidentified          | g_unidentified  |
| 2                                            | g_Acidibacter           | g_Acidibacter           | g_Candidatus_Solibacter | g_Acidibacter                   | g_Candidatus_Solibacter         | g_Candidatus_Solibacter | g_Candidatus_Solibacter | g_Candidatus_Solibacter | g_Rhodanobacter |
| 3                                            | g_Candidatus_Solibacter | g_Acidotherrmus         | g_Acidibacter           | g_Burkholderia-Paraburkholderia | g_Variibacter                   | g_Variibacter           | g_Variibacter           | g_Sorangium             | g_Acidotherrmus |
| 4                                            | g_Rhizomicrobium        | g_Candidatus_Solibacter | g_Rhizomicrobium        | g_Acidotherrmus                 | g_Burkholderia-Paraburkholderia | g_Acidotherrmus         | g_Bradyrhizobium        | g_Acidibacter           | g_Variibacter   |

|    |                                 |                                 |                                 |                         |                                |                                 |                                 |                                 |                                 |
|----|---------------------------------|---------------------------------|---------------------------------|-------------------------|--------------------------------|---------------------------------|---------------------------------|---------------------------------|---------------------------------|
| 5  | g_Bryobacter                    | g_Rhizomicrobium                | g_Bryobacter                    | g_Candidatus_Solibacter | g_Acidibacter                  | g_Bradyrhizobium                | g_Acidibacter                   | g_Acidothermus                  | g_Acidibacter                   |
| 6  | g_Acidothermus                  | g_Bryobacter                    | g_Acidothermus                  | g_Bradyrhizobium        | g_Bradyrhizobium               | g_Bryobacter                    | g_Acidothermus                  | g_Bryobacter                    | g_Burkholderia-Paraburkholderia |
| 7  | g_Variibacter                   | g_Variibacter                   | g_Variibacter                   | g_Variibacter           | g_Rhizomicrobium               | g_Acidibacter                   | g_Rhizomicrobium                | g_Rhizomicrobium                | g_Bradyrhizobium                |
| 8  | g_Sorangium                     | g_Bradyrhizobium                | g_Sorangium                     | g_Bryobacter            | g_Bryobacter                   | g_Burkholderia-Paraburkholderia | g_Bryobacter                    | g_Variibacter                   | g_Candidatus_Solibacter         |
| 9  | g_Haliangium                    | g_Burkholderia-Paraburkholderia | g_Candidatus_Koribacter         | g_Rhizomicrobium        | g_Acidothermus                 | g_Rhizomicrobium                | g_Sorangium                     | g_Burkholderia-Paraburkholderia | g_Rhizomicrobium                |
| 10 | g_Burkholderia-Paraburkholderia | g_Roseiarcus                    | g_Granulicella                  | g_Roseiarcus            | g_H16                          | g_Candidatus_Koribacter         | g_Burkholderia-Paraburkholderia | g_Granulicella                  | g_Bryobacter                    |
| 11 | g_Roseiarcus                    | g_Sorangium                     | g_Burkholderia-Paraburkholderia | g_Sorangium             | g_Candidatus_Xiphinematobacter | g_Sorangium                     | g_Reyranel                      | g_Mucilaginibacter              | g_Granulicella                  |
| 12 | g_Sp                            | g_Candidatus                    | g_Roseiarcus                    | g_Granulicella          | g_Acidobacter                  | g_Granulic                      | g_H16                           | g_Candidatus                    | g_Candidatus                    |

|    | hingo<br>monas                          | s_Koribacter           |                        | a erium                                |                                 | ella                                   |                                 | us_Koribact<br>er    | us_Xiphinem<br>atobacter        |
|----|-----------------------------------------|------------------------|------------------------|----------------------------------------|---------------------------------|----------------------------------------|---------------------------------|----------------------|---------------------------------|
| 13 | g_Br<br>adyrh<br>izobi<br>um            | g_Granulic<br>ella     | g_Acidobac<br>terium   | g_Candidat<br>us_Xiphinem<br>atobacter | g_Sphingom<br>onas              | g_Roseiarc<br>us                       | g_Roseiarc<br>us                | g_Bradyrhi<br>zobium | g_Dyella                        |
| 14 | g_Ca<br>ndida<br>tus_K<br>oriba<br>cter | g_Telmatos<br>pirillum | g_Bradyrhi<br>zobium   | g_Mycobact<br>erium                    | g_Candidat<br>us_Koribact<br>er | g_H16                                  | g_Candidat<br>us_Koribact<br>er | g_Roseiarc<br>us     | g_Candidat<br>us_Koribact<br>er |
| 15 | g_Ac<br>idoce<br>lla                    | g_Acidical<br>dus      | g_Haliangi<br>um       | g_Candidat<br>us_Koribact<br>er        | g_Granulic<br>ella              | g_Candidat<br>us_Xiphinem<br>atobacter | g_Haliangi<br>um                | g_Acidobac<br>terium | g_Acidical<br>dus               |
| 16 | g_Ac<br>idica<br>ldus                   | g_Haliangi<br>um       | g_Mucilagi<br>nibacter | g_Acidical<br>dus                      | g_Sorangiu<br>m                 | g_Haliangi<br>um                       | g_Acidical<br>dus               | g_Haliangi<br>um     | g_Acidobac<br>terium            |
| 17 | g_Gr<br>anuli<br>cella                  | g_Sphingom<br>onas     | g_Telmatos<br>pirillum | g_Leptothr<br>ix                       | g_Roseiarc<br>us                | g_Acidical<br>dus                      | g_Granulic<br>ella              | g_Bdellovi<br>brio   | g_Sphingom<br>onas              |
| 18 | g_Te<br>lmato<br>spiri<br>llum          | g_Acidobac<br>terium   | g_Inquilin<br>us       | g_H16                                  | g_Acidical<br>dus               | g_Luedeman<br>nella                    | g_Rhizobiu<br>m                 | g_Sphingom<br>onas   | g_Roseiarc<br>us                |
| 19 | g_Ed<br>aphob                           | g_Acidocel<br>la       | g_Bdellovi<br>brio     | g_Acidobac<br>terium                   | g_Mycobact<br>erium             | g_Acidobac<br>terium                   | g_Sphingom<br>onas              | g_H16                | g_Mycobact<br>erium             |

---

acter

**20**

|       |             |             |             |           |             |             |           |        |
|-------|-------------|-------------|-------------|-----------|-------------|-------------|-----------|--------|
| g__Ac | g__Bdellovi | g__Acidical | g__Haliangi | g__Dyella | g__Gemmatim | g__Candidat | g__Dyella | g__H16 |
| idoba | brio        | dus         | um          |           | onas        | us_Xiphinem |           |        |
| cteri |             |             |             |           |             | atobacter   |           |        |
| um    |             |             |             |           |             |             |           |        |





|   |      |     |     |       |     |     |     |     |      |     |      |       |     |     |      |     |     |      |     |     |
|---|------|-----|-----|-------|-----|-----|-----|-----|------|-----|------|-------|-----|-----|------|-----|-----|------|-----|-----|
| M | 1.0  | 7.0 | 16. | 8.0   | 90. | 4.0 | 138 | 16. | 14.0 | 8.0 | 0.0  | 0.0   | 48. | 115 | 0.0  | 36. | 11. | 21.0 | 100 | 4.0 |
| F |      |     | 0   |       | 0   |     | 2.0 | 0   |      |     |      |       | 0   | .0  |      | 0   | 0   |      | 91. |     |
| K |      |     |     |       |     |     |     |     |      |     |      |       |     |     |      |     |     |      | 0   |     |
| 1 |      |     |     |       |     |     |     |     |      |     |      |       |     |     |      |     |     |      |     |     |
| M | 13.0 | 1.0 | 178 | 23.0  | 0.0 | 0.0 | 238 | 39. | 2.0  | 2.0 | 5116 | 3.0   | 53. | 2.0 | 0.0  | 4.0 | 61. | 20.0 | 32. | 6.0 |
| F |      |     | 2.0 |       |     |     | .0  | 0   |      |     | .0   |       | 0   |     |      |     | 0   |      | 0   |     |
| K |      |     |     |       |     |     |     |     |      |     |      |       |     |     |      |     |     |      |     |     |
| 2 |      |     |     |       |     |     |     |     |      |     |      |       |     |     |      |     |     |      |     |     |
| M | 0.0  | 1.0 | 885 | 136.0 | 0.0 | 474 | 8.0 | 12. | 3231 | 0.0 | 0.0  | 14.0  | 10. | 0.0 | 0.0  | 0.0 | 2.0 | 0.0  | 2.0 | 4.0 |
| F |      |     | .0  |       |     | 0.0 |     | 0   | .0   |     |      |       | 0   |     |      |     |     |      |     |     |
| K |      |     |     |       |     |     |     |     |      |     |      |       |     |     |      |     |     |      |     |     |
| 3 |      |     |     |       |     |     |     |     |      |     |      |       |     |     |      |     |     |      |     |     |
| M | 0.0  | 0.0 | 0.0 | 0.0   | 0.0 | 0.0 | 98. | 0.0 | 0.0  | 355 | 0.0  | 6136. | 58. | 0.0 | 48.0 | 0.0 | 0.0 | 6651 | 1.0 | 0.0 |
| F |      |     |     |       |     |     | 0   |     |      | 1.0 |      | 0     | 0   |     |      |     |     | .0   |     |     |
| E |      |     |     |       |     |     |     |     |      |     |      |       |     |     |      |     |     |      |     |     |
| 1 |      |     |     |       |     |     |     |     |      |     |      |       |     |     |      |     |     |      |     |     |
| M | 1.0  | 2.0 | 10. | 1.0   | 3.0 | 8.0 | 102 | 741 | 42.0 | 713 | 0.0  | 22.0  | 9.0 | 3.0 | 0.0  | 374 | 32. | 2773 | 630 | 68. |
| F |      |     | 0   |       |     |     | 4.0 | .0  |      | .0  |      |       |     |     |      | 0.0 | 0   | .0   | .0  | 0   |
| E |      |     |     |       |     |     |     |     |      |     |      |       |     |     |      |     |     |      |     |     |
| 2 |      |     |     |       |     |     |     |     |      |     |      |       |     |     |      |     |     |      |     |     |
| M | 2.0  | 0.0 | 14. | 5.0   | 32. | 398 | 762 | 36. | 1697 | 104 | 2.0  | 9.0   | 89. | 52. | 0.0  | 482 | 217 | 366. | 175 | 4.0 |
| F |      |     | 0   |       | 0   | .0  | .0  | 0   | .0   | .0  |      |       | 0   | 0   |      | .0  | 7.0 | 0    | .0  |     |
| E |      |     |     |       |     |     |     |     |      |     |      |       |     |     |      |     |     |      |     |     |
| 3 |      |     |     |       |     |     |     |     |      |     |      |       |     |     |      |     |     |      |     |     |
| M | 990. | 21. | 7.0 | 58.0  | 4.0 | 0.0 | 105 | 17. | 3.0  | 109 | 33.0 | 1.0   | 140 | 2.0 | 0.0  | 128 | 957 | 196. | 236 | 11. |





| G | SB | SB  | SB              | SB  | SB  | SB  | SB  | SB     | SB  | SB  | SB     | SB  | SB  | SB    | SB0 | SB   | SB  | SBOT | SB | SBOT |
|---|----|-----|-----------------|-----|-----|-----|-----|--------|-----|-----|--------|-----|-----|-------|-----|------|-----|------|----|------|
| r | OT | OTU | OT              | OTU | OTU | OTU | OTU | OTU_35 | OTU | OTU | OTU_41 | OTU | OTU | OTU_1 | TU_ | OTU_ | OTU | U_16 | OT | U_1  |
| o | U_ | _69 | U_              | _64 | _27 | _12 | _28 |        | _11 | _3  |        | _24 | _25 | 0     | 4   | 18   | _6  |      | U_ |      |
| u | 30 |     | 70              |     |     |     |     |        |     |     |        |     |     |       |     |      |     |      | 5  |      |
| p |    |     |                 |     |     |     |     |        |     |     |        |     |     |       |     |      |     |      |    |      |
|   | g_ | f__ | g_              | g__ | f__ | o__ | p__ | f_Xan  | p__ | p__ | f_Xan  | f__ | o__ | f_Rh  | p__ | f_A  | g__ | f_A  | g_ | f_A  |
|   | _R | Sol | _S              | Aci | Sol | Rho | Aci | thomon | Aci | Aci | thomon | Cau | Rho | izobi | Aci | cido | Bra | cido | _V | cido |
|   | os | iba | or              | dot | iba | dos | dob | adales | dob | dob | adales | lob | dos | ales_ | dob | bact | dyr | bact | ar | bact |
|   | ei | cte | an              | her | cte | pir | act | _Incer | act | act | _Incer | act | pir | Incer | act | eria | hiz | eria | ii | eria |
|   | ar | rac | gi              | mus | rac | ill | eri | tae_Se | eri | eri | tae_Se | era | ill | tae_S | eri | ceae | obi | ceae | ba | ceae |
|   | cu | eae | um <sup>1</sup> |     | eae | ale | a   | dis    | a   | a   | dis    | cea | ale | edis  | a   | _    | um  |      | ct | _    |
|   | s  |     |                 |     | _   | s   |     |        |     |     |        | e   | s   |       |     |      |     |      | er |      |
| S | 51 | 165 | 25              | 315 | 304 | 239 | 157 | 487.0  | 158 | 231 | 186.0  | 450 | 547 | 428.0 | 391 | 496. | 117 | 769. | 10 | 567. |
| B | 6. | .0  | 2.              | .0  | .0  | .0  | .0  |        | .0  | .0  |        | .0  | .0  |       | .0  | 0    | 1.0 | 0    | 73 | 0    |
| K | 0  |     | 0               |     |     |     |     |        |     |     |        |     |     |       |     |      |     |      | .0 |      |
| 1 |    |     |                 |     |     |     |     |        |     |     |        |     |     |       |     |      |     |      |    |      |
| 2 |    |     |                 |     |     |     |     |        |     |     |        |     |     |       |     |      |     |      |    |      |
| S | 17 | 226 | 79              | 181 | 399 | 90. | 275 | 278.0  | 123 | 642 | 397.0  | 278 | 273 | 448.0 | 441 | 618. | 272 | 1358 | 66 | 1375 |
| B | 5. | .0  | 7.              | .0  | .0  | 0   | .0  |        | .0  | .0  |        | .0  | .0  |       | .0  | 0    | .0  | .0   | 2. | .0   |
| K | 0  |     | 0               |     |     |     |     |        |     |     |        |     |     |       |     |      |     |      | 0  |      |
| 2 |    |     |                 |     |     |     |     |        |     |     |        |     |     |       |     |      |     |      |    |      |
| S | 18 | 57. | 50              | 380 | 141 | 640 | 51. | 302.0  | 58. | 333 | 27.0   | 124 | 647 | 137.0 | 96. | 283. | 668 | 430. | 10 | 230. |
| B | 2. | 0   | .0              | .0  | .0  | .0  | 0   |        | 0   | .0  |        | .0  | .0  |       | 0   | 0    | .0  | 0    | 52 | 0    |
| K | 0  |     |                 |     |     |     |     |        |     |     |        |     |     |       |     |      |     |      | .0 |      |
| 3 |    |     |                 |     |     |     |     |        |     |     |        |     |     |       |     |      |     |      |    |      |
| S | 14 | 75. | 16              | 277 | 200 | 364 | 187 | 207.0  | 617 | 161 | 477.0  | 219 | 371 | 212.0 | 138 | 172. | 996 | 304. | 14 | 551. |



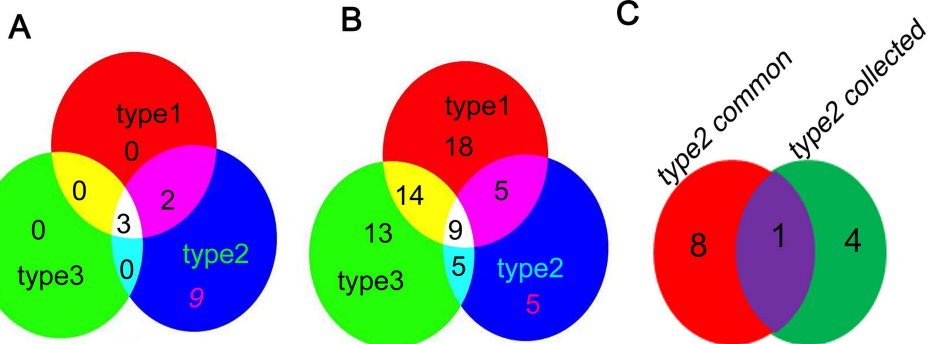

**D**

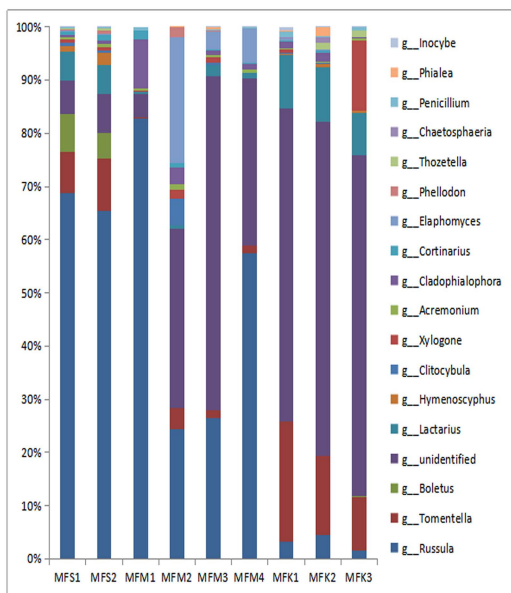

**E**

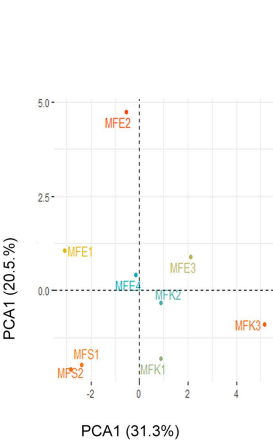

**F**

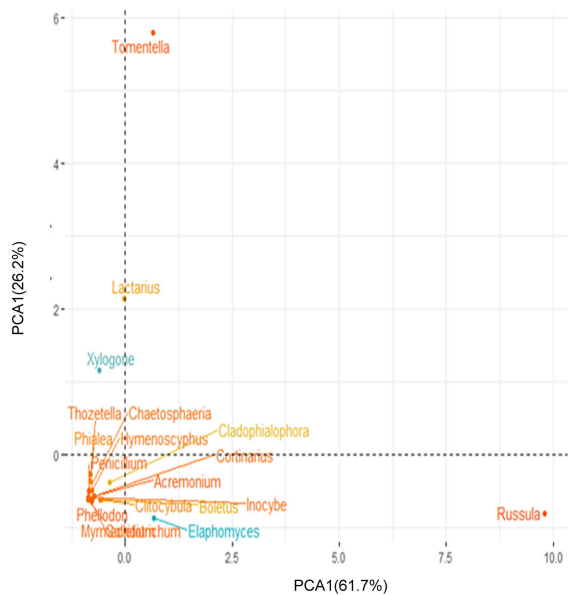

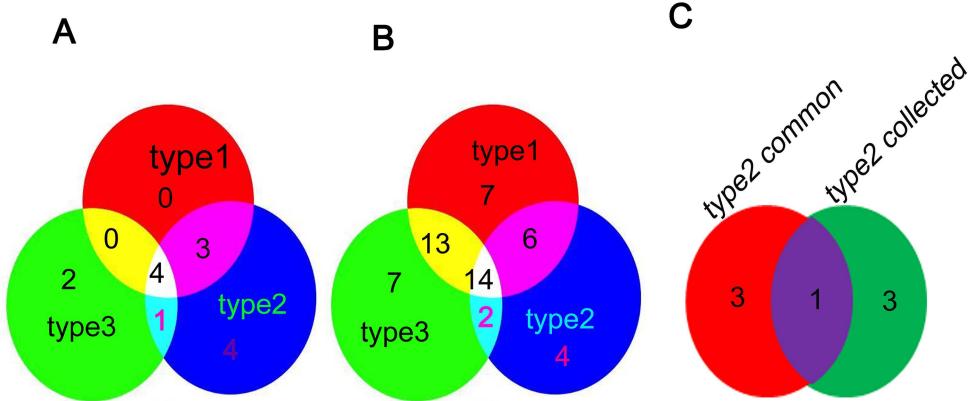

**D**

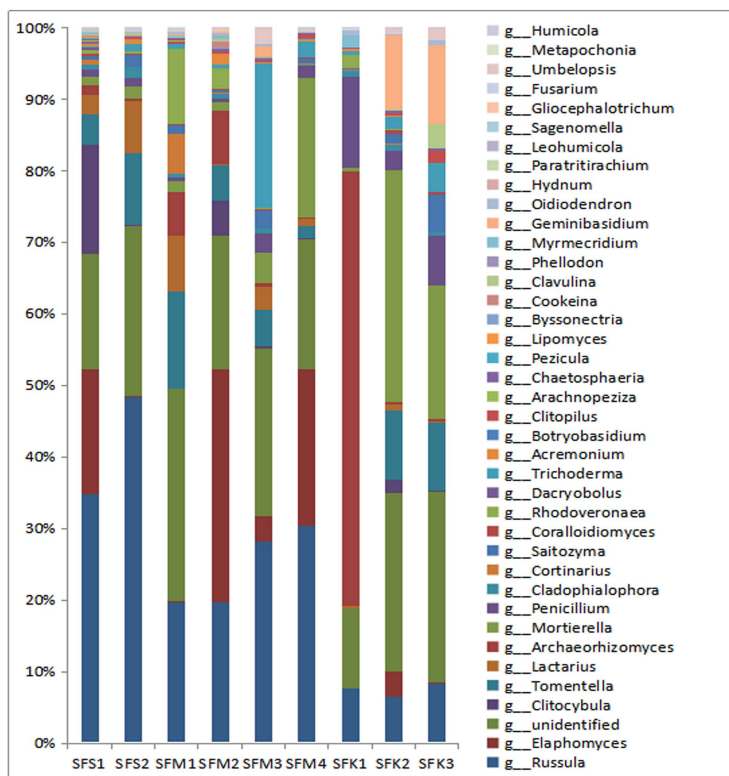

**E**

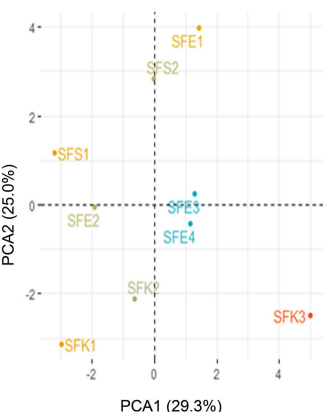

**F**

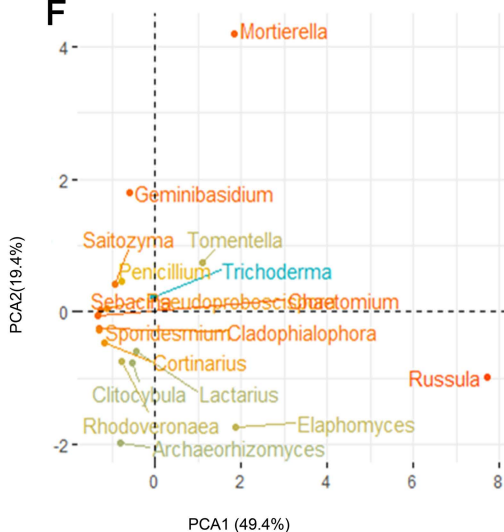

A

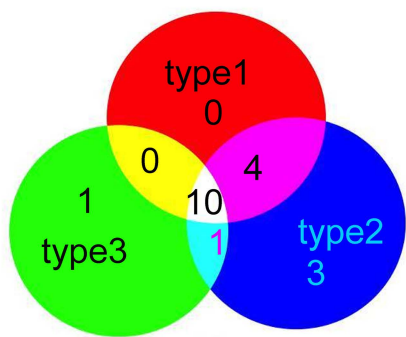

B

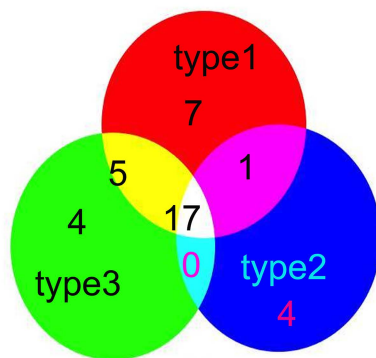

C

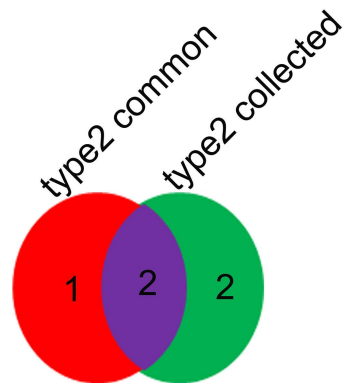

D

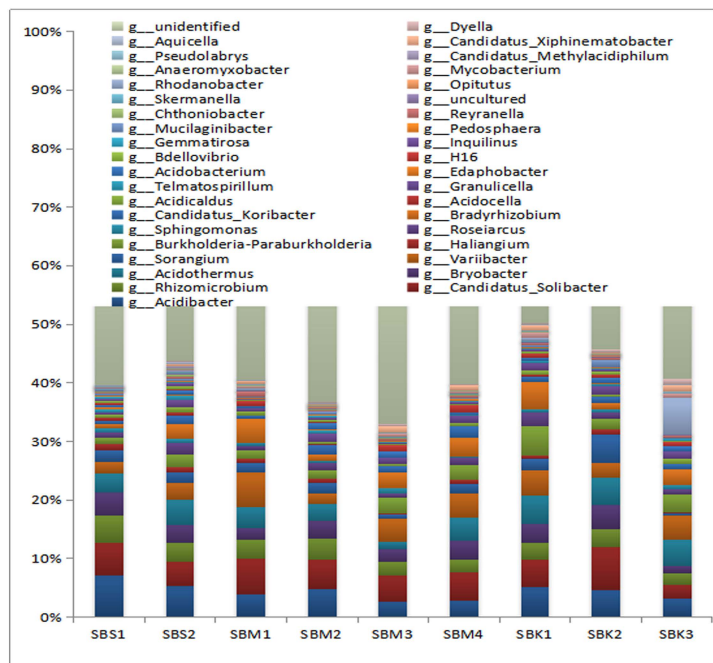

E

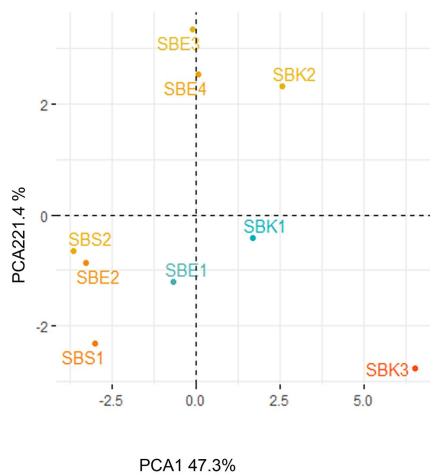

F

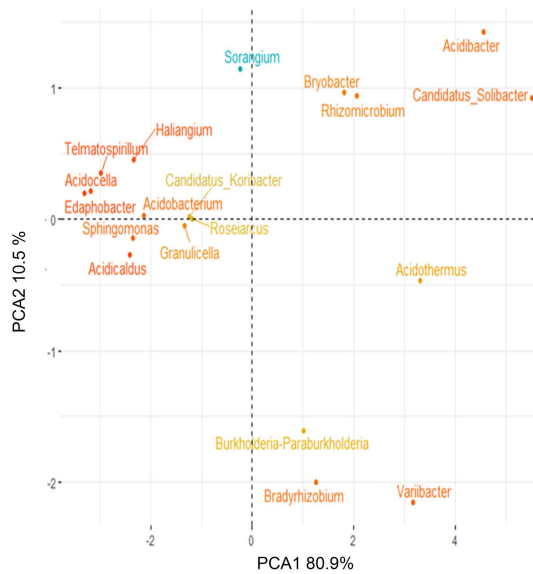



A Ectomycorrhizal *Russula*

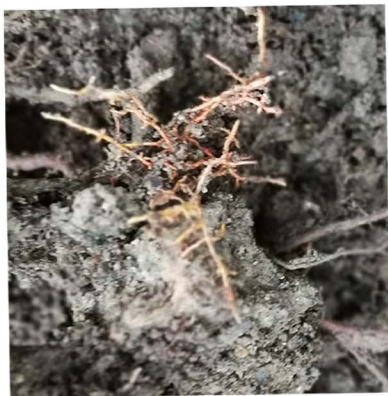

B Extramatrical mycelium of *Russula*

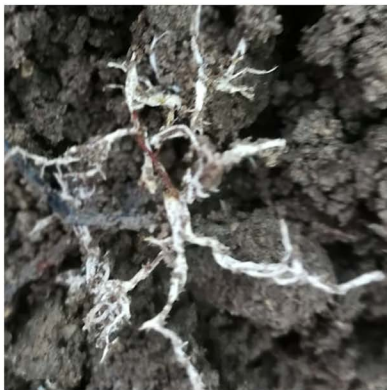

C

*Russula* and extramatrical mycelium of *Russula*

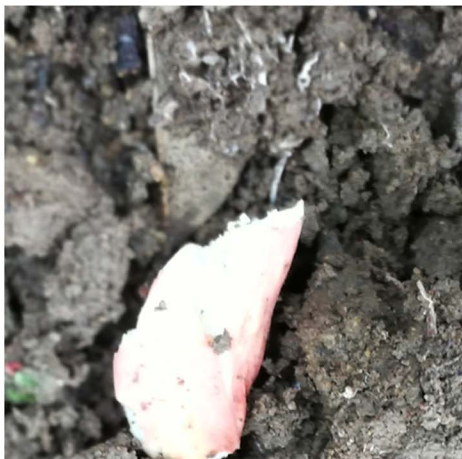

Source: https://www.biorxiv.org/content/10.1101/2020.04.22.056713v1.full.pdf
